# Supplementary material for: The Effects of Artificially Dosed Adult Rumen Contents on Abomasum Transcriptome and Associated Microbial Community Structure in Calves
Source: MDPI journal article supplement (doi:10.3390/genes12030424), 2021-03-16
Supplement: s1 [file s1]

# **The effects of artificially dosed adult rumen contents on abomasum transcriptome and associated microbial community structure in calves**

**Naren Gaowa<sup>1</sup>, Wenli Li<sup>2\*</sup>, Brianna Murphy<sup>2</sup>, Madison Cox<sup>3</sup>**

1 State Key Laboratory of Animal Nutrition, Beijing Engineering Technology, Research Center of Raw Milk Quality and Safety Control, College of Animal Science and Technology, China Agricultural University, No.2 Yuanmingyuan West Road, Haidian, Beijing 100193, China.

2 The Cell Wall Utilization and Biology Laboratory, USDA Agricultural Research Service, US Dairy Forage Research Center, Madison, WI 53706, USA

3 Department of Microbiology, University of Wisconsin-Madison, Madison, WI, 53706, USA

\*Correspondence: [wenli.li@ars.usda.gov](mailto:wenli.li@ars.usda.gov)

**Supplementary Table 3** Genera in the abomasum between HE and Con groups

| Genus                 | Con     | HE      | Pvalue |
|-----------------------|---------|---------|--------|
| Desulfovibrio         | 185.17  | 337.16  | 0.0209 |
| Leptotrichia          | 11.16   | 3.05    | 0.0421 |
| Tannerella            | 61.72   | 512.06  | 0.0433 |
| Eubacterium           | 517.69  | 154.89  | 0.0433 |
| Deinococcus           | 4.07    | 0.00    | 0.0472 |
| Dehalococcoides       | 50.59   | 23.32   | 0.0833 |
| Methylobacterium      | 5.34    | 33.21   | 0.0833 |
| Streptomyces          | 1.63    | 0.00    | 0.1306 |
| Rickettsia            | 4.77    | 2.61    | 0.1391 |
| Helicobacter          | 12.61   | 5.19    | 0.1465 |
| Clostridium           | 3540.71 | 9810.74 | 0.1489 |
| Acinetobacter         | 3004.76 | 1729.05 | 0.1489 |
| Hymenobacter          | 46.93   | 152.26  | 0.1489 |
| Francisella           | 422.09  | 225.16  | 0.1489 |
| Ruminiclostridium     | 176.41  | 63.17   | 0.1489 |
| Capnocytophaga        | 129.22  | 87.64   | 0.1489 |
| Hyphomicrobium        | 31.87   | 16.89   | 0.1489 |
| Thermotoga            | 4.14    | 0.69    | 0.1663 |
| Spirosoma             | 128.08  | 5.07    | 0.2367 |
| Algoriphagus          | 41.32   | 39.16   | 0.2367 |
| Chlamydia             | 0.89    | 6.97    | 0.2367 |
| Kocuria               | 10.00   | 10.80   | 0.2454 |
| Nitrosospira          | 3604.57 | 1956.52 | 0.2482 |
| Sphaerochaeta         | 382.07  | 312.80  | 0.2482 |
| Staphylococcus        | 252.72  | 495.23  | 0.2482 |
| Mycoplasma            | 165.52  | 322.03  | 0.2482 |
| Halanaerobium         | 21.17   | 43.15   | 0.2482 |
| Thermoanaerobacterium | 171.69  | 20.03   | 0.2482 |
| Exiguobacterium       | 179.60  | 38.39   | 0.2482 |
| Bartonella            | 8.25    | 665.97  | 0.2482 |
| Synechococcus         | 107.39  | 82.34   | 0.2482 |
| Ochrobactrum          | 181.69  | 115.53  | 0.2482 |
| Pseudomonas           | 95.28   | 65.29   | 0.2482 |
| Flavobacterium        | 10.92   | 117.24  | 0.2482 |
| Kangiella             | 16.83   | 38.61   | 0.2482 |
| Entomoplasma          | 0.98    | 0.00    | 0.3173 |
| Rubrobacter           | 0.24    | 0.00    | 0.3173 |
| Fervidobacterium      | 0.24    | 0.00    | 0.3173 |
| Ruminococcus          | 2109.88 | 3084.00 | 0.3865 |
| Parabacteroides       | 2190.15 | 2244.44 | 0.3865 |
| Alistipes             | 155.96  | 244.54  | 0.3865 |

|                    |          |          |        |
|--------------------|----------|----------|--------|
| Selenomonas        | 2436.65  | 1665.58  | 0.3865 |
| Desulfosporosinus  | 46.56    | 33.00    | 0.3865 |
| Dickeya            | 326.98   | 236.35   | 0.3865 |
| Olsenella          | 92.99    | 211.50   | 0.3865 |
| Salmonella         | 103.57   | 208.10   | 0.3865 |
| Methanobrevibacter | 73.53    | 56.94    | 0.3865 |
| Blattabacterium    | 19.34    | 29.41    | 0.3865 |
| Comamonas          | 5.25     | 37.01    | 0.3865 |
| Calothrix          | 1.93     | 14.53    | 0.4419 |
| Candidatus         | 3.52     | 25.28    | 0.4678 |
| Burkholderia       | 0.24     | 2.84     | 0.5083 |
| Alkaliphilus       | 0.95     | 19.75    | 0.5385 |
| Sphingomonas       | 5.78     | 4.34     | 0.5541 |
| Fusobacterium      | 15.63    | 13.25    | 0.5614 |
| Prevotella         | 50205.65 | 44085.48 | 0.5637 |
| Lachnoclostridium  | 3311.75  | 4002.15  | 0.5637 |
| Butyrivibrio       | 5634.20  | 6216.90  | 0.5637 |
| Treponema          | 2904.58  | 2257.47  | 0.5637 |
| Lactobacillus      | 1911.82  | 2487.17  | 0.5637 |
| Anaerococcus       | 460.78   | 284.04   | 0.5637 |
| Tumebacillus       | 47.19    | 120.04   | 0.5637 |
| Psychrobacter      | 399.19   | 273.57   | 0.5637 |
| Campylobacter      | 911.47   | 760.14   | 0.5637 |
| Bifidobacterium    | 214.24   | 1435.58  | 0.5637 |
| Desulfotomaculum   | 118.87   | 125.68   | 0.5637 |
| Neisseria          | 690.59   | 331.39   | 0.5637 |
| Veillonella        | 317.46   | 280.41   | 0.5637 |
| Dehalobacter       | 172.07   | 116.81   | 0.5637 |
| Aeromonas          | 311.70   | 488.57   | 0.5637 |
| Paenibacillus      | 231.76   | 155.67   | 0.5637 |
| Listeria           | 10.20    | 55.44    | 0.5637 |
| Bdellovibrio       | 109.27   | 66.05    | 0.5637 |
| Streptococcus      | 53.22    | 265.80   | 0.5637 |
| Aerococcus         | 60.35    | 38.02    | 0.5637 |
| Leuconostoc        | 129.70   | 44.69    | 0.5637 |
| Brevibacillus      | 28.32    | 52.59    | 0.5637 |
| Corynebacterium    | 27.59    | 61.14    | 0.5637 |
| Geobacter          | 21.38    | 22.98    | 0.5637 |
| Pseudoalteromonas  | 5.84     | 36.72    | 0.5637 |
| Taylorella         | 33.66    | 17.54    | 0.5637 |
| Porphyromonas      | 6.75     | 7.45     | 0.7674 |
| Rhodococcus        | 7.76     | 27.66    | 0.7715 |
| Moraxella          | 209.41   | 149.58   | 0.7728 |

|                    |         |         |        |
|--------------------|---------|---------|--------|
| Acholeplasma       | 43.20   | 67.02   | 0.7728 |
| Ureaplasma         | 129.37  | 179.92  | 0.7728 |
| Rufibacter         | 74.18   | 112.85  | 0.7728 |
| Nitrosomonas       | 139.24  | 44.17   | 0.7728 |
| Erysipelothrix     | 32.27   | 38.67   | 0.7728 |
| Spiroplasma        | 26.39   | 37.16   | 0.7728 |
| Geobacillus        | 8.04    | 25.39   | 0.8845 |
| Planococcus        | 20.22   | 18.47   | 0.8845 |
| Chryseobacterium   | 4.54    | 11.58   | 0.8845 |
| Bacteroides        | 4523.94 | 4295.69 | 1.0000 |
| Blautia            | 4185.05 | 3934.08 | 1.0000 |
| Acidaminococcus    | 517.48  | 609.05  | 1.0000 |
| Mucilaginibacter   | 193.05  | 348.34  | 1.0000 |
| Pelosinus          | 255.77  | 255.21  | 1.0000 |
| Bacillus           | 93.80   | 93.31   | 1.0000 |
| Desulfitobacterium | 8.98    | 18.86   | 1.0000 |
| Enterococcus       | 13.37   | 13.81   | 1.0000 |
| Vibrio             | 5.10    | 6.62    | 1.0000 |

---
