# Supplementary material for: The Effects of Artificially Dosed Adult Rumen Contents on Abomasum Transcriptome and Associated Microbial Community Structure in Calves
Source: MDPI journal article supplement (doi:10.3390/genes12030424), 2021-03-16
Supplement: s1 [file s1]

# **The effects of artificially dosed adult rumen contents on abomasum transcriptome and associated microbial community structure in calves**

**Naren Gaowa<sup>1</sup>, Wenli Li<sup>2\*</sup>, Brianna Murphy<sup>2</sup>, Madison Cox<sup>3</sup>**

1 State Key Laboratory of Animal Nutrition, Beijing Engineering Technology, Research Center of Raw Milk Quality and Safety Control, College of Animal Science and Technology, China Agricultural University, No.2 Yuanmingyuan West Road, Haidian, Beijing 100193, China.

2 The Cell Wall Utilization and Biology Laboratory, USDA Agricultural Research Service, US Dairy Forage Research Center, Madison, WI 53706, USA

3 Department of Microbiology, University of Wisconsin-Madison, Madison, WI, 53706, USA

\*Correspondence: [wenli.li@ars.usda.gov](mailto:wenli.li@ars.usda.gov)

**Supplementary Table 1** Differentially expressed genes between HE and Con groups

| Gene.Name    | HE       | Con     | baseMean | log2FoldChange | pvalue |
|--------------|----------|---------|----------|----------------|--------|
| JAKMIP2      | 839.06   | 77.71   | 458.39   | 3.43           | 0.0000 |
| ISG15        | 313.28   | 32.36   | 172.82   | 3.27           | 0.0006 |
| BPIFA2A      | 306.73   | 32.21   | 169.47   | 3.24           | 0.0001 |
| CCK          | 490.65   | 55.77   | 273.21   | 3.13           | 0.0200 |
| ATP13A5      | 259.88   | 32.68   | 146.28   | 2.98           | 0.0312 |
| OAS1X        | 620.02   | 102.76  | 361.39   | 2.59           | 0.0014 |
| LOC100139670 | 313.63   | 58.38   | 186.00   | 2.42           | 0.0060 |
| ADGRG7       | 1995.20  | 385.20  | 1190.20  | 2.37           | 0.0000 |
| LOC781988    | 57.15    | 11.55   | 34.35    | 2.33           | 0.0010 |
| LOC100298356 | 61.64    | 12.64   | 37.14    | 2.28           | 0.0240 |
| IFI44        | 316.16   | 69.39   | 192.78   | 2.19           | 0.0045 |
| C6H4orf17    | 44.17    | 9.46    | 26.81    | 2.19           | 0.0011 |
| CFAP206      | 42.33    | 9.17    | 25.75    | 2.18           | 0.0072 |
| PAX6         | 136.49   | 30.92   | 83.71    | 2.13           | 0.0011 |
| IFIT3        | 125.72   | 28.58   | 77.15    | 2.12           | 0.0082 |
| OAS1Y        | 1002.52  | 233.07  | 617.79   | 2.11           | 0.0012 |
| RSAD2        | 895.31   | 208.47  | 551.89   | 2.10           | 0.0054 |
| SLC28A3      | 32.77    | 7.54    | 20.15    | 2.04           | 0.0001 |
| PCSK2        | 1397.96  | 348.94  | 873.45   | 2.00           | 0.0020 |
| NEUROD1      | 54.68    | 14.15   | 34.41    | 1.95           | 0.0010 |
| LYPD8        | 27.10    | 6.84    | 16.97    | 1.95           | 0.0003 |
| FCGR2B       | 700.45   | 182.78  | 441.62   | 1.93           | 0.0035 |
| SCTR         | 90.61    | 24.31   | 57.46    | 1.88           | 0.0015 |
| CA8          | 25575.35 | 7082.50 | 16328.92 | 1.85           | 0.0045 |
| LOC107131521 | 282.08   | 78.83   | 180.45   | 1.83           | 0.0013 |
| ZBP1         | 746.80   | 212.77  | 479.78   | 1.81           | 0.0031 |
| ISG12(B)     | 2313.07  | 662.02  | 1487.55  | 1.80           | 0.0064 |
| AQP5         | 29.34    | 8.14    | 18.74    | 1.80           | 0.0438 |
| SYT13        | 127.51   | 36.43   | 81.97    | 1.79           | 0.0007 |
| RTP4         | 44.28    | 13.05   | 28.67    | 1.76           | 0.0324 |
| C3H1orf168   | 63.00    | 18.02   | 40.51    | 1.76           | 0.0001 |
| NPC1L1       | 123.98   | 36.51   | 80.25    | 1.75           | 0.0223 |
| TMC5         | 218.40   | 64.36   | 141.38   | 1.75           | 0.0098 |
| TXNDC8       | 55.11    | 16.98   | 36.04    | 1.75           | 0.0012 |
| ISG20        | 185.95   | 55.38   | 120.66   | 1.74           | 0.0021 |
| MX1          | 2410.85  | 724.91  | 1567.88  | 1.73           | 0.0071 |
| FREM2        | 2098.10  | 632.42  | 1365.26  | 1.73           | 0.0000 |
| EYA2         | 23.52    | 6.95    | 15.24    | 1.72           | 0.0321 |
| BHMT2        | 48.13    | 14.68   | 31.40    | 1.72           | 0.0022 |
| HRASLS       | 38.20    | 11.42   | 24.81    | 1.70           | 0.0055 |
| SLC12A3      | 42.39    | 12.70   | 27.54    | 1.68           | 0.0002 |

|           |         |         |         |      |        |
|-----------|---------|---------|---------|------|--------|
| APOL3     | 352.88  | 110.15  | 231.52  | 1.68 | 0.0005 |
| GPR119    | 37.88   | 11.52   | 24.70   | 1.67 | 0.0105 |
| CMPK2     | 440.85  | 140.39  | 290.62  | 1.65 | 0.0008 |
| USP18     | 914.53  | 291.63  | 603.08  | 1.65 | 0.0013 |
| EPSTI1    | 1475.52 | 473.38  | 974.45  | 1.64 | 0.0013 |
| SST       | 3168.56 | 1025.40 | 2096.98 | 1.63 | 0.0208 |
| OAS2      | 106.86  | 35.39   | 71.13   | 1.60 | 0.0144 |
| PAPPA2    | 542.89  | 179.10  | 360.99  | 1.60 | 0.0381 |
| CASR      | 152.78  | 50.72   | 101.75  | 1.58 | 0.0003 |
| LPAR5     | 31.42   | 10.42   | 20.92   | 1.55 | 0.0038 |
| CYP2B6    | 929.56  | 321.19  | 625.38  | 1.54 | 0.0001 |
| FCGR2A    | 16.04   | 5.56    | 10.80   | 1.53 | 0.0022 |
| LGALS9    | 1151.11 | 399.13  | 775.12  | 1.53 | 0.0000 |
| TMPRSS4   | 285.79  | 98.96   | 192.37  | 1.52 | 0.0086 |
| ACER2     | 1414.66 | 497.19  | 955.93  | 1.51 | 0.0055 |
| PKIB      | 567.72  | 199.78  | 383.75  | 1.51 | 0.0000 |
| OSR1      | 15.70   | 5.52    | 10.61   | 1.50 | 0.0441 |
| IFI44L    | 346.87  | 122.56  | 234.72  | 1.50 | 0.0086 |
| ATP2A3    | 3837.48 | 1390.54 | 2614.01 | 1.46 | 0.0037 |
| KCNH3     | 14.43   | 5.19    | 9.81    | 1.46 | 0.0161 |
| PAK6      | 34.17   | 12.86   | 23.52   | 1.46 | 0.0014 |
| NME5      | 52.64   | 19.24   | 35.94   | 1.46 | 0.0021 |
| SLC6A11   | 234.94  | 86.00   | 160.47  | 1.44 | 0.0198 |
| PLCXD3    | 764.55  | 281.42  | 522.99  | 1.44 | 0.0055 |
| LY86      | 192.93  | 70.99   | 131.96  | 1.44 | 0.0045 |
| NR1I2     | 33.09   | 12.47   | 22.78   | 1.43 | 0.0166 |
| DEGS2     | 213.76  | 80.07   | 146.91  | 1.42 | 0.0001 |
| GPA33     | 27.57   | 10.31   | 18.94   | 1.41 | 0.0403 |
| MCTP2     | 1681.83 | 633.79  | 1157.81 | 1.41 | 0.0029 |
| CERKL     | 94.86   | 36.18   | 65.52   | 1.40 | 0.0033 |
| LOC530929 | 7911.51 | 3022.18 | 5466.84 | 1.39 | 0.0163 |
| DHX58     | 274.21  | 105.65  | 189.93  | 1.38 | 0.0022 |
| MIR2904-3 | 31.81   | 12.66   | 22.24   | 1.36 | 0.0107 |
| TSPAN3    | 2532.04 | 987.55  | 1759.80 | 1.36 | 0.0000 |
| HERC6     | 1861.47 | 733.74  | 1297.61 | 1.34 | 0.0316 |
| CCL16     | 147.06  | 58.68   | 102.87  | 1.33 | 0.0007 |
| GBA3      | 52.49   | 21.79   | 37.14   | 1.33 | 0.0043 |
| LDLRAD1   | 16.06   | 6.33    | 11.20   | 1.33 | 0.0216 |
| KCNK5     | 898.47  | 358.57  | 628.52  | 1.33 | 0.0000 |
| ANPEP     | 97.52   | 39.06   | 68.29   | 1.32 | 0.0003 |
| HEPACAM2  | 541.95  | 218.10  | 380.02  | 1.32 | 0.0043 |
| ARHGEF19  | 13.27   | 5.25    | 9.26    | 1.31 | 0.0387 |
| BAIAP2L2  | 504.02  | 203.24  | 353.63  | 1.31 | 0.0000 |

|             |          |         |          |      |        |
|-------------|----------|---------|----------|------|--------|
| KCNN4       | 499.56   | 200.98  | 350.27   | 1.31 | 0.0435 |
| AMPH        | 159.27   | 64.67   | 111.97   | 1.31 | 0.0270 |
| RASGRF1     | 30.30    | 12.28   | 21.29    | 1.30 | 0.0373 |
| VWA3B       | 326.75   | 132.75  | 229.75   | 1.29 | 0.0020 |
| XAF1        | 112.70   | 46.47   | 79.59    | 1.29 | 0.0260 |
| UNC5CL      | 35.81    | 14.53   | 25.17    | 1.27 | 0.0472 |
| B3GNT7      | 65.35    | 26.71   | 46.03    | 1.27 | 0.0329 |
| HMGCS2      | 7606.70  | 3151.37 | 5379.04  | 1.27 | 0.0178 |
| IGSF9       | 115.61   | 48.78   | 82.20    | 1.25 | 0.0146 |
| ADCY1       | 47.34    | 20.50   | 33.92    | 1.24 | 0.0054 |
| DGAT2       | 1161.70  | 494.43  | 828.06   | 1.23 | 0.0000 |
| AMPD3       | 48.78    | 20.60   | 34.69    | 1.22 | 0.0191 |
| MYH14       | 959.02   | 412.98  | 686.00   | 1.21 | 0.0011 |
| MISP        | 621.15   | 267.52  | 444.33   | 1.21 | 0.0118 |
| MEIS2       | 16618.32 | 7194.63 | 11906.48 | 1.21 | 0.0464 |
| CA10        | 453.39   | 198.07  | 325.73   | 1.20 | 0.0271 |
| EVPL        | 116.48   | 51.57   | 84.03    | 1.18 | 0.0067 |
| PAH         | 52.00    | 23.47   | 37.74    | 1.18 | 0.0260 |
| C16H1orf106 | 90.63    | 40.25   | 65.44    | 1.18 | 0.0001 |
| F5          | 198.19   | 89.02   | 143.61   | 1.17 | 0.0209 |
| ABHD1       | 329.50   | 147.05  | 238.28   | 1.16 | 0.0058 |
| UGT1A6      | 4917.70  | 2200.33 | 3559.02  | 1.16 | 0.0121 |
| LOC613966   | 404.03   | 181.85  | 292.94   | 1.16 | 0.0064 |
| PCSK1       | 248.86   | 112.55  | 180.71   | 1.15 | 0.0016 |
| CAPSL       | 61.57    | 28.05   | 44.81    | 1.15 | 0.0198 |
| REP15       | 101.97   | 46.92   | 74.44    | 1.14 | 0.0075 |
| GATM        | 3474.25  | 1578.91 | 2526.58  | 1.14 | 0.0221 |
| SLC38A5     | 48.96    | 22.06   | 35.51    | 1.13 | 0.0068 |
| TEX9        | 482.06   | 220.89  | 351.48   | 1.12 | 0.0203 |
| FBP2        | 61.46    | 27.95   | 44.70    | 1.12 | 0.0416 |
| CA13        | 957.68   | 440.88  | 699.28   | 1.12 | 0.0316 |
| ABO         | 236.17   | 108.43  | 172.30   | 1.12 | 0.0063 |
| SLC38A4     | 93.58    | 43.25   | 68.42    | 1.11 | 0.0005 |
| OVOL1       | 122.82   | 56.87   | 89.85    | 1.11 | 0.0137 |
| FAM102A     | 569.08   | 264.48  | 416.78   | 1.11 | 0.0004 |
| MKRN2OS     | 29.60    | 13.51   | 21.55    | 1.10 | 0.0322 |
| MYO7B       | 223.80   | 104.63  | 164.21   | 1.10 | 0.0261 |
| MCF2L       | 124.45   | 58.44   | 91.44    | 1.10 | 0.0066 |
| DAB1        | 203.67   | 94.83   | 149.25   | 1.10 | 0.0480 |
| DTX3L       | 574.40   | 268.33  | 421.36   | 1.10 | 0.0011 |
| GUCY2C      | 190.56   | 88.82   | 139.69   | 1.10 | 0.0065 |
| MYOM3       | 14.52    | 6.82    | 10.67    | 1.09 | 0.0421 |
| ECM1        | 263.95   | 124.24  | 194.09   | 1.08 | 0.0130 |

|           |          |          |          |      |        |
|-----------|----------|----------|----------|------|--------|
| LDLRAD3   | 4218.13  | 1996.54  | 3107.34  | 1.08 | 0.0198 |
| GCLC      | 980.95   | 465.48   | 723.21   | 1.08 | 0.0039 |
| GPR63     | 55.24    | 26.24    | 40.74    | 1.07 | 0.0013 |
| TLR2      | 36.04    | 16.77    | 26.40    | 1.06 | 0.0245 |
| KCNB2     | 2373.15  | 1142.30  | 1757.72  | 1.06 | 0.0087 |
| MAP3K15   | 643.12   | 309.57   | 476.35   | 1.05 | 0.0195 |
| SLC35G2   | 178.72   | 86.14    | 132.43   | 1.05 | 0.0032 |
| TWIST2    | 213.41   | 104.04   | 158.73   | 1.05 | 0.0065 |
| CYP2C87   | 195.05   | 94.31    | 144.68   | 1.04 | 0.0271 |
| MCOLN2    | 637.83   | 309.42   | 473.62   | 1.04 | 0.0134 |
| AIM1L     | 138.64   | 67.41    | 103.02   | 1.04 | 0.0157 |
| SORL1     | 2153.54  | 1047.69  | 1600.61  | 1.04 | 0.0197 |
| IFIH1     | 802.31   | 390.48   | 596.40   | 1.04 | 0.0179 |
| FAM83H    | 61.41    | 29.86    | 45.63    | 1.04 | 0.0391 |
| AK8       | 169.67   | 83.46    | 126.57   | 1.04 | 0.0041 |
| MST1R     | 335.37   | 164.13   | 249.75   | 1.03 | 0.0058 |
| LOC514243 | 132.72   | 65.55    | 99.13    | 1.03 | 0.0187 |
| GJB1      | 209.15   | 102.22   | 155.69   | 1.02 | 0.0244 |
| UNC5B     | 562.77   | 276.86   | 419.81   | 1.02 | 0.0001 |
| RORC      | 438.81   | 216.48   | 327.65   | 1.02 | 0.0378 |
| ZNFX1     | 1466.63  | 724.07   | 1095.35  | 1.02 | 0.0215 |
| MIR2904-1 | 180.73   | 90.02    | 135.38   | 1.02 | 0.0197 |
| CAPN5     | 1820.63  | 902.25   | 1361.44  | 1.01 | 0.0010 |
| HNF4A     | 671.59   | 334.47   | 503.03   | 1.00 | 0.0010 |
| PARP14    | 1616.09  | 805.63   | 1210.86  | 1.00 | 0.0080 |
| AGRN      | 418.41   | 209.50   | 313.96   | 1.00 | 0.0024 |
| LOC505479 | 111.60   | 56.11    | 83.85    | 0.99 | 0.0421 |
| SYTL2     | 20020.32 | 10061.30 | 15040.81 | 0.99 | 0.0174 |
| LGALS3BP  | 456.54   | 230.08   | 343.31   | 0.99 | 0.0150 |
| GDNF      | 113.97   | 57.58    | 85.78    | 0.99 | 0.0187 |
| CNKSR1    | 55.66    | 28.20    | 41.93    | 0.99 | 0.0079 |
| DAPP1     | 109.04   | 54.76    | 81.90    | 0.99 | 0.0149 |
| GSDMB     | 158.79   | 80.40    | 119.59   | 0.98 | 0.0017 |
| ITGB4     | 1262.18  | 639.38   | 950.78   | 0.98 | 0.0131 |
| NCF2      | 24.28    | 12.40    | 18.34    | 0.97 | 0.0433 |
| TRIM14    | 124.64   | 63.24    | 93.94    | 0.97 | 0.0026 |
| LOC515578 | 155.24   | 79.38    | 117.31   | 0.97 | 0.0174 |
| SEMA4G    | 1270.20  | 648.58   | 959.39   | 0.97 | 0.0028 |
| TTLL10    | 336.68   | 172.43   | 254.56   | 0.97 | 0.0041 |
| LPIN2     | 1444.94  | 742.38   | 1093.66  | 0.96 | 0.0015 |
| NELL2     | 113.00   | 58.92    | 85.96    | 0.96 | 0.0407 |
| RPH3AL    | 1011.59  | 522.19   | 766.89   | 0.95 | 0.0017 |
| AK5       | 461.11   | 237.90   | 349.50   | 0.95 | 0.0076 |

|           |         |         |         |      |        |
|-----------|---------|---------|---------|------|--------|
| AGBL3     | 67.44   | 34.93   | 51.19   | 0.95 | 0.0083 |
| BMP7      | 481.39  | 249.26  | 365.32  | 0.95 | 0.0279 |
| CHN2      | 5865.92 | 3043.15 | 4454.53 | 0.95 | 0.0013 |
| DDX58     | 836.76  | 435.28  | 636.02  | 0.94 | 0.0268 |
| MBD6      | 83.85   | 43.71   | 63.78   | 0.94 | 0.0210 |
| ALDH1A1   | 5773.42 | 3007.92 | 4390.67 | 0.94 | 0.0282 |
| NQO1      | 1590.83 | 830.91  | 1210.87 | 0.94 | 0.0183 |
| DHRS13    | 24.05   | 12.76   | 18.41   | 0.93 | 0.0172 |
| CCDC68    | 3218.87 | 1694.73 | 2456.80 | 0.93 | 0.0380 |
| SULT2B1   | 63.66   | 33.49   | 48.57   | 0.92 | 0.0305 |
| VILL      | 2631.73 | 1388.76 | 2010.25 | 0.92 | 0.0059 |
| GPRC5B    | 509.04  | 268.16  | 388.60  | 0.92 | 0.0220 |
| RIPK3     | 76.70   | 40.23   | 58.47   | 0.92 | 0.0180 |
| FAM101A   | 165.14  | 86.76   | 125.95  | 0.92 | 0.0399 |
| RASAL1    | 288.62  | 152.40  | 220.51  | 0.92 | 0.0177 |
| EFNB1     | 165.92  | 87.75   | 126.84  | 0.91 | 0.0024 |
| SWAP70    | 2144.80 | 1140.38 | 1642.59 | 0.91 | 0.0116 |
| TMEM163   | 642.47  | 343.38  | 492.93  | 0.90 | 0.0066 |
| ADAR      | 950.53  | 508.70  | 729.62  | 0.90 | 0.0136 |
| PCTP      | 329.41  | 175.35  | 252.38  | 0.90 | 0.0136 |
| BLNK      | 740.44  | 396.91  | 568.68  | 0.90 | 0.0148 |
| RAMP1     | 194.00  | 103.50  | 148.75  | 0.90 | 0.0285 |
| IGFBP2    | 614.37  | 330.05  | 472.21  | 0.90 | 0.0045 |
| FAM83E    | 82.77   | 44.05   | 63.41   | 0.89 | 0.0077 |
| ABCC3     | 2471.52 | 1331.05 | 1901.29 | 0.89 | 0.0016 |
| AFMID     | 104.74  | 55.94   | 80.34   | 0.89 | 0.0005 |
| MOV10     | 532.70  | 286.99  | 409.85  | 0.89 | 0.0068 |
| PYCARD    | 76.67   | 41.00   | 58.83   | 0.89 | 0.0062 |
| ANKRD29   | 275.26  | 149.04  | 212.15  | 0.89 | 0.0097 |
| NECTIN4   | 103.87  | 56.16   | 80.01   | 0.88 | 0.0248 |
| SLC22A23  | 804.51  | 436.07  | 620.29  | 0.88 | 0.0028 |
| SYT17     | 856.68  | 465.25  | 660.96  | 0.88 | 0.0156 |
| APOBEC3Z2 | 37.24   | 20.52   | 28.88   | 0.88 | 0.0227 |
| DFNA5     | 55.23   | 29.64   | 42.43   | 0.88 | 0.0023 |
| TBC1D16   | 2936.26 | 1597.92 | 2267.09 | 0.88 | 0.0207 |
| CFAP69    | 400.92  | 218.33  | 309.62  | 0.87 | 0.0234 |
| ITPR3     | 1359.38 | 743.49  | 1051.43 | 0.87 | 0.0113 |
| SLC9A1    | 2983.14 | 1633.88 | 2308.51 | 0.87 | 0.0102 |
| TTC22     | 1152.40 | 631.00  | 891.70  | 0.87 | 0.0424 |
| FAM83G    | 100.61  | 55.01   | 77.81   | 0.87 | 0.0069 |
| SGSM1     | 478.73  | 262.68  | 370.71  | 0.87 | 0.0083 |
| GFRA2     | 293.80  | 161.25  | 227.52  | 0.87 | 0.0240 |
| MDH1B     | 54.54   | 30.60   | 42.57   | 0.85 | 0.0177 |

|           |         |         |         |      |        |
|-----------|---------|---------|---------|------|--------|
| PPARD     | 386.27  | 214.09  | 300.18  | 0.85 | 0.0025 |
| PARP9     | 916.55  | 508.09  | 712.32  | 0.85 | 0.0065 |
| ABCC6     | 49.29   | 28.05   | 38.67   | 0.85 | 0.0159 |
| TMEM54    | 372.21  | 206.99  | 289.60  | 0.85 | 0.0182 |
| PFKFB3    | 128.73  | 71.57   | 100.15  | 0.85 | 0.0005 |
| LAD1      | 201.33  | 112.22  | 156.77  | 0.84 | 0.0258 |
| TMEM79    | 162.49  | 91.08   | 126.78  | 0.84 | 0.0334 |
| SMPD3     | 315.43  | 176.90  | 246.17  | 0.84 | 0.0253 |
| PROSER2   | 510.80  | 286.14  | 398.47  | 0.84 | 0.0072 |
| CD177     | 79.63   | 45.37   | 62.50   | 0.83 | 0.0377 |
| SALL1     | 73.95   | 41.97   | 57.96   | 0.83 | 0.0334 |
| FER1L6    | 9930.33 | 5612.21 | 7771.27 | 0.82 | 0.0433 |
| ACE       | 105.24  | 59.52   | 82.38   | 0.82 | 0.0267 |
| SPIRE2    | 108.33  | 61.25   | 84.79   | 0.82 | 0.0246 |
| TRIM25    | 646.71  | 368.11  | 507.41  | 0.81 | 0.0029 |
| TLL1      | 882.27  | 503.44  | 692.85  | 0.81 | 0.0094 |
| CCDC189   | 24.35   | 13.99   | 19.17   | 0.81 | 0.0417 |
| MOB3B     | 4561.27 | 2603.22 | 3582.24 | 0.81 | 0.0289 |
| RGS14     | 49.79   | 28.78   | 39.29   | 0.81 | 0.0340 |
| CNNM4     | 272.89  | 155.76  | 214.32  | 0.81 | 0.0033 |
| ADAMTS5   | 412.85  | 235.66  | 324.25  | 0.81 | 0.0435 |
| ADAP1     | 176.10  | 100.43  | 138.26  | 0.80 | 0.0066 |
| TRANK1    | 2076.83 | 1190.73 | 1633.78 | 0.80 | 0.0211 |
| ACOT7     | 186.86  | 106.67  | 146.77  | 0.80 | 0.0138 |
| RPS6KA4   | 305.39  | 174.73  | 240.06  | 0.80 | 0.0323 |
| IHH       | 682.82  | 392.71  | 537.76  | 0.80 | 0.0169 |
| ICA1L     | 80.55   | 46.61   | 63.58   | 0.80 | 0.0234 |
| PTPRH     | 241.04  | 138.57  | 189.81  | 0.80 | 0.0383 |
| ABHD2     | 4994.79 | 2875.97 | 3935.38 | 0.80 | 0.0027 |
| NCKAP5    | 152.21  | 87.52   | 119.87  | 0.79 | 0.0072 |
| TRERF1    | 568.85  | 327.42  | 448.14  | 0.79 | 0.0244 |
| SLC19A1   | 29.69   | 17.09   | 23.39   | 0.79 | 0.0420 |
| CREB3L1   | 992.02  | 574.61  | 783.31  | 0.79 | 0.0048 |
| SEMA4B    | 404.99  | 235.01  | 320.00  | 0.78 | 0.0020 |
| SLC37A1   | 2715.52 | 1580.27 | 2147.89 | 0.78 | 0.0177 |
| ADM       | 407.47  | 239.32  | 323.39  | 0.78 | 0.0002 |
| PITX1     | 63.70   | 37.49   | 50.60   | 0.78 | 0.0395 |
| PTPN3     | 1555.75 | 910.88  | 1233.32 | 0.77 | 0.0257 |
| CCBE1     | 72.60   | 43.32   | 57.96   | 0.77 | 0.0241 |
| SARDH     | 217.31  | 127.52  | 172.41  | 0.77 | 0.0065 |
| KIAA1024L | 29.09   | 16.88   | 22.99   | 0.76 | 0.0380 |
| CABLES1   | 682.37  | 404.00  | 543.18  | 0.76 | 0.0023 |
| MMP15     | 543.06  | 322.16  | 432.61  | 0.76 | 0.0089 |

|              |         |         |         |      |        |
|--------------|---------|---------|---------|------|--------|
| TTC39A       | 871.36  | 516.74  | 694.05  | 0.75 | 0.0351 |
| SYK          | 632.39  | 375.00  | 503.70  | 0.75 | 0.0056 |
| SEZ6         | 36.42   | 21.74   | 29.08   | 0.75 | 0.0327 |
| ARHGAP27     | 375.57  | 223.24  | 299.40  | 0.75 | 0.0114 |
| CDCP1        | 1347.66 | 803.74  | 1075.70 | 0.75 | 0.0290 |
| ARRDC4       | 431.05  | 256.23  | 343.64  | 0.75 | 0.0310 |
| KHNYN        | 1138.80 | 678.41  | 908.60  | 0.75 | 0.0013 |
| TRIM6        | 183.37  | 109.95  | 146.66  | 0.75 | 0.0309 |
| HOMER2       | 717.98  | 428.07  | 573.02  | 0.74 | 0.0361 |
| SP140L       | 684.11  | 409.60  | 546.85  | 0.74 | 0.0042 |
| LOC512800    | 951.93  | 569.72  | 760.82  | 0.74 | 0.0117 |
| VWA3A        | 34.16   | 20.84   | 27.50   | 0.74 | 0.0476 |
| CTNNBIP1     | 127.07  | 76.16   | 101.61  | 0.74 | 0.0141 |
| RAB11FIP4    | 150.40  | 90.03   | 120.21  | 0.74 | 0.0381 |
| TXNRD1       | 1776.89 | 1067.14 | 1422.01 | 0.73 | 0.0131 |
| ZFP36L1      | 877.04  | 527.61  | 702.32  | 0.73 | 0.0146 |
| KDM1B        | 1093.32 | 658.52  | 875.92  | 0.73 | 0.0250 |
| EQTN         | 54.78   | 32.50   | 43.64   | 0.73 | 0.0390 |
| ETNK2        | 109.00  | 66.49   | 87.74   | 0.73 | 0.0360 |
| GRTP1        | 181.12  | 109.63  | 145.38  | 0.72 | 0.0067 |
| SLC6A6       | 171.45  | 104.28  | 137.86  | 0.72 | 0.0123 |
| GGT7         | 33.99   | 20.96   | 27.47   | 0.72 | 0.0429 |
| CHPT1        | 3397.52 | 2077.06 | 2737.29 | 0.71 | 0.0380 |
| FBLIM1       | 1185.59 | 728.24  | 956.91  | 0.70 | 0.0020 |
| CCDC85C      | 327.66  | 200.80  | 264.23  | 0.70 | 0.0093 |
| PMVK         | 251.47  | 154.59  | 203.03  | 0.70 | 0.0148 |
| FANCA        | 275.27  | 169.70  | 222.48  | 0.69 | 0.0424 |
| PLBD1        | 71.35   | 44.08   | 57.71   | 0.69 | 0.0125 |
| DISP1        | 964.17  | 596.31  | 780.24  | 0.69 | 0.0386 |
| SRC          | 573.87  | 354.95  | 464.41  | 0.69 | 0.0033 |
| KLHL13       | 380.40  | 235.22  | 307.81  | 0.69 | 0.0452 |
| HS6ST1       | 299.93  | 186.57  | 243.25  | 0.69 | 0.0053 |
| HHIP         | 731.76  | 454.48  | 593.12  | 0.69 | 0.0407 |
| ERN2         | 2045.24 | 1271.93 | 1658.59 | 0.69 | 0.0285 |
| CARD19       | 516.19  | 320.38  | 418.28  | 0.68 | 0.0063 |
| LOC104975499 | 1937.80 | 1206.26 | 1572.03 | 0.68 | 0.0238 |
| DQX1         | 204.41  | 127.94  | 166.17  | 0.68 | 0.0148 |
| MERTK        | 669.01  | 418.72  | 543.87  | 0.68 | 0.0408 |
| CHEK2        | 170.41  | 105.87  | 138.14  | 0.68 | 0.0186 |
| DAPK2        | 989.57  | 619.65  | 804.61  | 0.67 | 0.0498 |
| CANT1        | 72.33   | 45.02   | 58.68   | 0.67 | 0.0137 |
| NR2F6        | 495.62  | 311.69  | 403.66  | 0.67 | 0.0046 |
| SLC2A10      | 144.48  | 90.93   | 117.71  | 0.67 | 0.0451 |



|              |         |         |         |      |        |
|--------------|---------|---------|---------|------|--------|
| TDP1         | 548.37  | 345.95  | 447.16  | 0.66 | 0.0157 |
| LOC101902670 | 240.67  | 152.83  | 196.75  | 0.66 | 0.0407 |
| IRF5         | 120.43  | 75.96   | 98.20   | 0.65 | 0.0200 |
| FAM45A       | 840.36  | 534.63  | 687.49  | 0.65 | 0.0187 |
| NLRX1        | 50.79   | 32.12   | 41.45   | 0.65 | 0.0468 |
| MPP1         | 364.30  | 232.96  | 298.63  | 0.64 | 0.0273 |
| MXD1         | 1270.40 | 814.62  | 1042.51 | 0.64 | 0.0398 |
| ARID3A       | 315.98  | 204.16  | 260.07  | 0.64 | 0.0031 |
| ATP11A       | 355.24  | 229.16  | 292.20  | 0.63 | 0.0209 |
| BAI3         | 167.97  | 109.69  | 138.83  | 0.63 | 0.0422 |
| FOSL2        | 2293.04 | 1486.53 | 1889.78 | 0.63 | 0.0112 |
| TDRD7        | 2041.44 | 1328.56 | 1685.00 | 0.62 | 0.0312 |
| EPHB1        | 55.31   | 35.81   | 45.56   | 0.61 | 0.0382 |
| SYNJ2        | 620.00  | 405.43  | 512.72  | 0.61 | 0.0164 |
| STK10        | 1705.08 | 1115.57 | 1410.33 | 0.61 | 0.0259 |
| PLEKHA6      | 2373.50 | 1560.30 | 1966.90 | 0.61 | 0.0442 |
| MAST3        | 168.83  | 111.41  | 140.12  | 0.60 | 0.0329 |
| SIPA1L2      | 2336.05 | 1545.49 | 1940.77 | 0.60 | 0.0149 |
| DLGAP4       | 1529.41 | 1012.12 | 1270.76 | 0.59 | 0.0073 |
| LITAF        | 998.28  | 662.07  | 830.17  | 0.59 | 0.0423 |
| ZBTB7A       | 98.62   | 65.71   | 82.17   | 0.59 | 0.0247 |
| GRK5         | 4453.06 | 2965.56 | 3709.31 | 0.59 | 0.0028 |
| ITGA3        | 1213.54 | 809.20  | 1011.37 | 0.58 | 0.0114 |
| ST6GAL1      | 746.72  | 499.89  | 623.31  | 0.58 | 0.0025 |
| SORD         | 219.42  | 147.91  | 183.66  | 0.57 | 0.0075 |
| MDC1         | 169.09  | 113.24  | 141.16  | 0.57 | 0.0173 |
| RIN2         | 906.68  | 612.59  | 759.63  | 0.56 | 0.0062 |
| PML          | 356.22  | 241.63  | 298.93  | 0.56 | 0.0413 |
| EVL          | 1604.08 | 1085.86 | 1344.97 | 0.56 | 0.0466 |
| ELF4         | 330.07  | 224.37  | 277.22  | 0.56 | 0.0313 |
| DOCK8        | 1163.54 | 789.59  | 976.56  | 0.56 | 0.0354 |
| FRY          | 5383.96 | 3656.31 | 4520.13 | 0.56 | 0.0253 |
| ELMSAN1      | 412.19  | 279.50  | 345.85  | 0.56 | 0.0088 |
| POC1A        | 464.24  | 315.17  | 389.71  | 0.56 | 0.0291 |
| TRPM4        | 867.68  | 592.47  | 730.07  | 0.55 | 0.0155 |
| FBXL2        | 382.33  | 261.47  | 321.90  | 0.54 | 0.0389 |
| PXMP4        | 106.79  | 73.58   | 90.18   | 0.54 | 0.0308 |
| CD82         | 1255.77 | 867.44  | 1061.61 | 0.53 | 0.0259 |
| ASIC2        | 157.56  | 109.48  | 133.52  | 0.53 | 0.0201 |
| MACROD1      | 207.05  | 144.71  | 175.88  | 0.52 | 0.0078 |
| RCBTB1       | 1129.11 | 788.85  | 958.98  | 0.52 | 0.0300 |
| TBC1D22A     | 1123.85 | 785.23  | 954.54  | 0.52 | 0.0059 |
| VANGL1       | 881.63  | 617.44  | 749.53  | 0.52 | 0.0296 |

|          |         |         |         |       |        |
|----------|---------|---------|---------|-------|--------|
| ZMIZ1    | 2639.20 | 1846.24 | 2242.72 | 0.51  | 0.0177 |
| WDR73    | 93.56   | 65.48   | 79.52   | 0.51  | 0.0425 |
| SH3PXD2B | 1826.44 | 1286.55 | 1556.49 | 0.51  | 0.0054 |
| TMEM63B  | 942.81  | 662.99  | 802.90  | 0.51  | 0.0136 |
| CCDC88C  | 1749.38 | 1232.10 | 1490.74 | 0.51  | 0.0113 |
| KLF10    | 296.63  | 208.28  | 252.45  | 0.50  | 0.0411 |
| NDUFV3   | 348.31  | 493.22  | 420.76  | -0.50 | 0.0138 |
| HSD17B12 | 1726.54 | 2444.01 | 2085.28 | -0.50 | 0.0288 |
| RFXAP    | 50.63   | 72.66   | 61.64   | -0.50 | 0.0334 |
| CCT2     | 990.30  | 1402.18 | 1196.24 | -0.50 | 0.0076 |
| MCFD2    | 234.44  | 332.85  | 283.65  | -0.50 | 0.0151 |
| GAB2     | 313.75  | 445.35  | 379.55  | -0.50 | 0.0305 |
| HIPK3    | 2037.49 | 2893.43 | 2465.46 | -0.51 | 0.0402 |
| EIF3I    | 512.53  | 729.39  | 620.96  | -0.51 | 0.0202 |
| PHAX     | 225.50  | 319.77  | 272.64  | -0.51 | 0.0364 |
| KIAA0141 | 228.88  | 326.82  | 277.85  | -0.51 | 0.0234 |
| CRBN     | 651.80  | 928.09  | 789.94  | -0.51 | 0.0411 |
| CHCHD3   | 4529.30 | 6448.17 | 5488.74 | -0.51 | 0.0043 |
| DYNLRB1  | 140.00  | 199.10  | 169.55  | -0.51 | 0.0460 |
| OAZ1     | 1015.30 | 1451.61 | 1233.45 | -0.51 | 0.0174 |
| UFSP2    | 412.06  | 588.65  | 500.35  | -0.52 | 0.0171 |
| COPS9    | 90.31   | 129.69  | 110.00  | -0.52 | 0.0149 |
| YBX1     | 2626.52 | 3763.23 | 3194.88 | -0.52 | 0.0462 |
| HIBADH   | 1345.79 | 1929.90 | 1637.85 | -0.52 | 0.0316 |
| PHF10    | 557.72  | 801.93  | 679.83  | -0.52 | 0.0165 |
| COQ6     | 157.60  | 227.62  | 192.61  | -0.52 | 0.0301 |
| SEC61B   | 292.99  | 422.46  | 357.73  | -0.52 | 0.0147 |
| PSMB6    | 193.82  | 277.94  | 235.88  | -0.52 | 0.0357 |
| HMGN4    | 136.63  | 196.49  | 166.56  | -0.53 | 0.0293 |
| PPIB     | 1058.42 | 1525.43 | 1291.93 | -0.53 | 0.0300 |
| ADGB     | 146.05  | 211.73  | 178.89  | -0.53 | 0.0383 |
| SUCO     | 1265.03 | 1828.93 | 1546.98 | -0.53 | 0.0123 |
| TMEM126A | 87.46   | 126.24  | 106.85  | -0.53 | 0.0101 |
| JADE3    | 126.75  | 183.96  | 155.35  | -0.53 | 0.0497 |
| SPCS1    | 132.28  | 191.27  | 161.77  | -0.54 | 0.0132 |
| PRKAG1   | 138.94  | 201.71  | 170.33  | -0.54 | 0.0022 |
| APOO     | 119.59  | 174.51  | 147.05  | -0.54 | 0.0222 |
| SDCCAG3  | 90.44   | 130.40  | 110.42  | -0.54 | 0.0343 |
| SLC25A11 | 147.94  | 216.02  | 181.98  | -0.54 | 0.0147 |
| ATP6V0B  | 199.03  | 291.09  | 245.06  | -0.54 | 0.0412 |
| EIF1AX   | 400.04  | 582.42  | 491.23  | -0.54 | 0.0003 |
| HSPA9    | 1243.30 | 1813.04 | 1528.17 | -0.54 | 0.0012 |
| EIF2B4   | 129.54  | 188.71  | 159.13  | -0.54 | 0.0050 |

|           |         |         |         |       |        |
|-----------|---------|---------|---------|-------|--------|
| MRPL51    | 180.32  | 262.97  | 221.64  | -0.54 | 0.0182 |
| MRPL27    | 107.07  | 156.85  | 131.96  | -0.54 | 0.0491 |
| SLC39A6   | 299.00  | 437.53  | 368.26  | -0.55 | 0.0223 |
| PABPC1    | 2498.99 | 3648.78 | 3073.88 | -0.55 | 0.0270 |
| ACY1      | 122.04  | 179.50  | 150.77  | -0.55 | 0.0106 |
| MARS      | 174.20  | 253.91  | 214.05  | -0.55 | 0.0437 |
| DLST      | 606.04  | 887.17  | 746.60  | -0.55 | 0.0036 |
| LOC785691 | 161.62  | 235.09  | 198.35  | -0.55 | 0.0151 |
| RPS27L    | 182.31  | 265.99  | 224.15  | -0.55 | 0.0264 |
| THYN1     | 69.97   | 102.20  | 86.09   | -0.55 | 0.0132 |
| RPL36     | 936.19  | 1377.32 | 1156.75 | -0.56 | 0.0186 |
| MRPL55    | 88.84   | 131.95  | 110.39  | -0.56 | 0.0251 |
| MRPS18B   | 67.30   | 100.69  | 84.00   | -0.56 | 0.0439 |
| PAIP1     | 804.70  | 1192.02 | 998.36  | -0.57 | 0.0183 |
| ZNF664    | 202.61  | 301.89  | 252.25  | -0.57 | 0.0378 |
| CCSER2    | 1504.40 | 2233.33 | 1868.86 | -0.57 | 0.0457 |
| ATF4      | 824.26  | 1223.09 | 1023.67 | -0.57 | 0.0269 |
| LAMTOR2   | 87.45   | 129.87  | 108.66  | -0.57 | 0.0209 |
| NDUFC2    | 352.39  | 526.84  | 439.61  | -0.58 | 0.0019 |
| LAMTOR5   | 101.52  | 150.99  | 126.25  | -0.58 | 0.0102 |
| PELI1     | 1295.99 | 1937.29 | 1616.64 | -0.58 | 0.0262 |
| HINT1     | 186.36  | 278.38  | 232.37  | -0.58 | 0.0001 |
| C4H7orf73 | 554.37  | 831.17  | 692.77  | -0.58 | 0.0135 |
| PABPN1    | 566.68  | 851.44  | 709.06  | -0.58 | 0.0018 |
| ST3GAL6   | 338.79  | 509.45  | 424.12  | -0.58 | 0.0236 |
| DNAJB9    | 182.91  | 274.63  | 228.77  | -0.59 | 0.0245 |
| IMMT      | 769.69  | 1155.22 | 962.46  | -0.59 | 0.0007 |
| SDHA      | 1037.63 | 1558.33 | 1297.98 | -0.59 | 0.0436 |
| IMPDH2    | 208.81  | 312.64  | 260.73  | -0.59 | 0.0057 |
| CNN3      | 1054.42 | 1584.98 | 1319.70 | -0.59 | 0.0253 |
| LARP4     | 727.07  | 1095.85 | 911.46  | -0.59 | 0.0023 |
| TMEM14C   | 260.79  | 394.13  | 327.46  | -0.59 | 0.0003 |
| CACYBP    | 291.00  | 437.62  | 364.31  | -0.59 | 0.0031 |
| MRPL35    | 94.72   | 143.61  | 119.17  | -0.59 | 0.0189 |
| WDR55     | 168.65  | 254.08  | 211.37  | -0.59 | 0.0006 |
| TMEM203   | 37.59   | 56.78   | 47.18   | -0.59 | 0.0271 |
| RPL36A    | 566.33  | 854.33  | 710.33  | -0.60 | 0.0252 |
| TACC1     | 2859.03 | 4319.93 | 3589.48 | -0.60 | 0.0498 |
| EID1      | 310.82  | 469.53  | 390.17  | -0.60 | 0.0007 |
| NDUFA6    | 259.23  | 393.19  | 326.21  | -0.60 | 0.0384 |
| PHB       | 326.26  | 495.35  | 410.81  | -0.60 | 0.0239 |
| MPC2      | 226.82  | 344.85  | 285.84  | -0.60 | 0.0089 |
| RPL36AL   | 456.43  | 691.07  | 573.75  | -0.60 | 0.0090 |

|           |           |           |           |       |        |
|-----------|-----------|-----------|-----------|-------|--------|
| MEA1      | 132.27    | 200.91    | 166.59    | -0.60 | 0.0014 |
| REXO2     | 297.05    | 450.54    | 373.79    | -0.60 | 0.0126 |
| SUPT4H1   | 118.03    | 180.56    | 149.30    | -0.61 | 0.0016 |
| TRAPPC3   | 108.66    | 166.64    | 137.65    | -0.61 | 0.0046 |
| SDF2      | 122.32    | 187.15    | 154.74    | -0.61 | 0.0166 |
| ABHD17B   | 529.90    | 808.59    | 669.24    | -0.61 | 0.0333 |
| MRPL49    | 106.08    | 161.67    | 133.87    | -0.61 | 0.0055 |
| ESD       | 419.80    | 641.70    | 530.75    | -0.61 | 0.0065 |
| NOL7      | 105.10    | 160.29    | 132.70    | -0.61 | 0.0016 |
| ZNF394    | 60.96     | 92.71     | 76.84     | -0.61 | 0.0107 |
| ATPIF1    | 273.96    | 418.32    | 346.14    | -0.61 | 0.0228 |
| AMOTL2    | 124.62    | 191.66    | 158.14    | -0.61 | 0.0459 |
| SUCLG1    | 1056.50   | 1619.23   | 1337.87   | -0.61 | 0.0033 |
| WDR45     | 137.58    | 211.78    | 174.68    | -0.62 | 0.0478 |
| DNAJB2    | 55.52     | 85.75     | 70.64     | -0.62 | 0.0258 |
| SORT1     | 584.52    | 897.79    | 741.15    | -0.62 | 0.0126 |
| UQCRC2    | 1296.41   | 1992.28   | 1644.34   | -0.62 | 0.0020 |
| POMGNT1   | 192.52    | 297.03    | 244.77    | -0.62 | 0.0185 |
| DFFA      | 136.04    | 209.30    | 172.67    | -0.62 | 0.0024 |
| GHITM     | 802.13    | 1234.31   | 1018.22   | -0.62 | 0.0004 |
| RAB12     | 229.68    | 353.01    | 291.35    | -0.62 | 0.0376 |
| SRP14     | 170.50    | 260.89    | 215.70    | -0.62 | 0.0195 |
| DLAT      | 254.47    | 393.28    | 323.88    | -0.62 | 0.0021 |
| JTB       | 99.49     | 152.43    | 125.96    | -0.62 | 0.0025 |
| NDUFV2    | 671.25    | 1035.49   | 853.37    | -0.62 | 0.0081 |
| MEMO1     | 1040.87   | 1606.93   | 1323.90   | -0.63 | 0.0179 |
| MAP3K5    | 3078.51   | 4749.43   | 3913.97   | -0.63 | 0.0398 |
| MTCH1     | 794.84    | 1228.62   | 1011.73   | -0.63 | 0.0142 |
| PIGC      | 255.55    | 394.68    | 325.12    | -0.63 | 0.0104 |
| TMEM143   | 37.83     | 59.45     | 48.64     | -0.63 | 0.0381 |
| SNX9      | 1156.22   | 1792.60   | 1474.41   | -0.63 | 0.0124 |
| PXMP2     | 119.76    | 186.25    | 153.00    | -0.63 | 0.0348 |
| FKBP4     | 406.68    | 631.30    | 518.99    | -0.63 | 0.0054 |
| MRPL11    | 117.53    | 181.92    | 149.72    | -0.63 | 0.0027 |
| BCO2      | 154.00    | 239.96    | 196.98    | -0.63 | 0.0012 |
| ATP6V1D   | 462.80    | 719.81    | 591.30    | -0.64 | 0.0213 |
| NDUFB8    | 328.69    | 511.76    | 420.23    | -0.64 | 0.0015 |
| KDR       | 1049.13   | 1633.21   | 1341.17   | -0.64 | 0.0355 |
| BEX2      | 100.99    | 156.65    | 128.82    | -0.64 | 0.0484 |
| IDH3A     | 304.88    | 476.49    | 390.69    | -0.64 | 0.0030 |
| LOC404103 | 120.73    | 188.03    | 154.38    | -0.64 | 0.0457 |
| CTPS1     | 188.70    | 295.03    | 241.86    | -0.64 | 0.0005 |
| COX1      | 157153.18 | 245499.98 | 201326.58 | -0.64 | 0.0480 |

|          |          |          |          |       |        |
|----------|----------|----------|----------|-------|--------|
| NDUFA12  | 282.02   | 442.29   | 362.15   | -0.65 | 0.0093 |
| ACAT1    | 828.68   | 1298.90  | 1063.79  | -0.65 | 0.0313 |
| PGAM1    | 616.29   | 965.93   | 791.11   | -0.65 | 0.0161 |
| FH       | 566.13   | 888.73   | 727.43   | -0.65 | 0.0036 |
| IKBIP    | 268.71   | 422.06   | 345.38   | -0.65 | 0.0000 |
| TMEM258  | 91.77    | 144.79   | 118.28   | -0.65 | 0.0275 |
| PRDX3    | 375.62   | 591.18   | 483.40   | -0.65 | 0.0003 |
| CHCHD2   | 384.17   | 603.63   | 493.90   | -0.65 | 0.0000 |
| MRPL53   | 134.67   | 211.28   | 172.97   | -0.65 | 0.0036 |
| HACD3    | 219.29   | 345.70   | 282.50   | -0.65 | 0.0007 |
| NAA20    | 410.10   | 646.12   | 528.11   | -0.66 | 0.0001 |
| MYH10    | 782.18   | 1234.13  | 1008.15  | -0.66 | 0.0126 |
| SGMS2    | 289.14   | 455.30   | 372.22   | -0.66 | 0.0494 |
| GPI      | 670.21   | 1058.31  | 864.26   | -0.66 | 0.0014 |
| PRSS23   | 656.90   | 1037.45  | 847.18   | -0.66 | 0.0001 |
| NDUFB3   | 208.92   | 330.62   | 269.77   | -0.66 | 0.0044 |
| NDUFA9   | 293.63   | 466.40   | 380.02   | -0.66 | 0.0049 |
| FAM96B   | 70.38    | 110.76   | 90.57    | -0.66 | 0.0102 |
| TMEM45A  | 526.83   | 838.15   | 682.49   | -0.67 | 0.0006 |
| TOMM40   | 72.49    | 115.40   | 93.94    | -0.67 | 0.0271 |
| ND4      | 14436.29 | 22964.93 | 18700.61 | -0.67 | 0.0393 |
| DNAJC19  | 106.05   | 169.64   | 137.84   | -0.67 | 0.0102 |
| COX7A2L  | 576.68   | 920.23   | 748.46   | -0.67 | 0.0459 |
| CUTA     | 122.40   | 196.42   | 159.41   | -0.68 | 0.0353 |
| TMCC3    | 186.26   | 297.78   | 242.02   | -0.68 | 0.0300 |
| NDUFB5   | 312.43   | 500.11   | 406.27   | -0.68 | 0.0037 |
| PRMT1    | 179.64   | 287.02   | 233.33   | -0.68 | 0.0446 |
| NDUFS1   | 1493.36  | 2393.59  | 1943.48  | -0.68 | 0.0061 |
| JDP2     | 188.79   | 303.15   | 245.97   | -0.68 | 0.0406 |
| ATP6V1E1 | 370.63   | 595.28   | 482.96   | -0.68 | 0.0111 |
| MRPL34   | 87.88    | 141.76   | 114.82   | -0.69 | 0.0402 |
| AFG3L2   | 403.04   | 650.32   | 526.68   | -0.69 | 0.0012 |
| TNIK     | 2720.36  | 4397.21  | 3558.78  | -0.69 | 0.0144 |
| VDAC2    | 865.70   | 1400.77  | 1133.24  | -0.69 | 0.0001 |
| VMA21    | 375.49   | 607.42   | 491.46   | -0.69 | 0.0030 |
| LDLRAD4  | 1032.48  | 1672.59  | 1352.54  | -0.70 | 0.0285 |
| SNHG12   | 45.38    | 74.85    | 60.12    | -0.70 | 0.0416 |
| DCUN1D4  | 703.52   | 1149.38  | 926.45   | -0.71 | 0.0340 |
| CCDC107  | 51.59    | 83.76    | 67.67    | -0.71 | 0.0255 |
| PDHA1    | 1319.83  | 2158.67  | 1739.25  | -0.71 | 0.0127 |
| IDH3B    | 395.46   | 647.88   | 521.67   | -0.71 | 0.0160 |
| FAHD1    | 49.94    | 81.70    | 65.82    | -0.71 | 0.0368 |
| SGPP1    | 141.21   | 232.64   | 186.92   | -0.72 | 0.0025 |

|              |        |         |         |       |        |
|--------------|--------|---------|---------|-------|--------|
| BLOC1S1      | 53.11  | 87.43   | 70.27   | -0.72 | 0.0303 |
| TXN2         | 202.58 | 334.27  | 268.43  | -0.72 | 0.0070 |
| MRPL21       | 110.49 | 182.86  | 146.67  | -0.72 | 0.0068 |
| C1QBP        | 151.40 | 249.79  | 200.60  | -0.72 | 0.0008 |
| NDUFB11      | 129.61 | 214.01  | 171.81  | -0.72 | 0.0145 |
| C10H14orf166 | 647.76 | 1069.84 | 858.80  | -0.72 | 0.0058 |
| HADH         | 408.34 | 675.17  | 541.76  | -0.72 | 0.0216 |
| SLC25A10     | 84.62  | 140.89  | 112.76  | -0.72 | 0.0168 |
| PGK1         | 820.64 | 1357.06 | 1088.85 | -0.73 | 0.0013 |
| FGF13        | 47.54  | 78.83   | 63.18   | -0.73 | 0.0041 |
| MRPL16       | 73.02  | 121.51  | 97.27   | -0.73 | 0.0201 |
| TMEM35B      | 24.67  | 40.58   | 32.63   | -0.73 | 0.0152 |
| AK3          | 785.25 | 1300.52 | 1042.89 | -0.73 | 0.0171 |
| FKBP2        | 94.86  | 157.83  | 126.35  | -0.73 | 0.0126 |
| CAPRIN2      | 168.22 | 279.58  | 223.90  | -0.73 | 0.0148 |
| IL11RA       | 34.52  | 57.95   | 46.24   | -0.73 | 0.0348 |
| FAM189A2     | 326.07 | 542.63  | 434.35  | -0.73 | 0.0080 |
| SLIRP        | 126.23 | 210.51  | 168.37  | -0.74 | 0.0000 |
| TOMM40L      | 57.30  | 96.04   | 76.67   | -0.74 | 0.0183 |
| BSG          | 790.14 | 1320.03 | 1055.08 | -0.74 | 0.0019 |
| TOMM5        | 56.37  | 94.62   | 75.50   | -0.74 | 0.0243 |
| PTPN13       | 602.14 | 1006.56 | 804.35  | -0.74 | 0.0074 |
| SLC25A23     | 72.69  | 121.24  | 96.96   | -0.74 | 0.0416 |
| NDUFAB1      | 166.30 | 279.45  | 222.87  | -0.74 | 0.0030 |
| PDXK         | 116.24 | 195.67  | 155.95  | -0.74 | 0.0473 |
| ARSJ         | 396.60 | 666.50  | 531.55  | -0.75 | 0.0328 |
| LOC509972    | 25.46  | 42.39   | 33.93   | -0.75 | 0.0134 |
| SVBP         | 51.16  | 85.20   | 68.18   | -0.75 | 0.0274 |
| MPND         | 37.69  | 64.04   | 50.86   | -0.75 | 0.0396 |
| PLCG1        | 124.40 | 210.03  | 167.21  | -0.75 | 0.0187 |
| RNF34        | 389.57 | 658.58  | 524.07  | -0.76 | 0.0353 |
| STARD8       | 57.30  | 97.99   | 77.64   | -0.76 | 0.0256 |
| GABARAPL2    | 263.64 | 446.75  | 355.19  | -0.76 | 0.0100 |
| PEBP1        | 999.88 | 1694.45 | 1347.16 | -0.76 | 0.0000 |
| ATP5E        | 286.67 | 487.22  | 386.95  | -0.76 | 0.0077 |
| GADD45GIP1   | 22.01  | 37.84   | 29.92   | -0.76 | 0.0407 |
| DDT          | 45.97  | 79.20   | 62.58   | -0.77 | 0.0181 |
| ISCA1        | 334.83 | 571.27  | 453.05  | -0.77 | 0.0273 |
| TPI1         | 524.94 | 894.20  | 709.57  | -0.77 | 0.0020 |
| SPAG1        | 129.96 | 220.77  | 175.36  | -0.77 | 0.0187 |
| TIMM17A      | 51.93  | 89.33   | 70.63   | -0.77 | 0.0295 |
| CYCS         | 197.72 | 338.13  | 267.93  | -0.77 | 0.0198 |
| UBE2M        | 77.57  | 132.67  | 105.12  | -0.77 | 0.0198 |

|              |          |          |          |       |        |
|--------------|----------|----------|----------|-------|--------|
| ND3          | 8269.47  | 14161.53 | 11215.50 | -0.78 | 0.0073 |
| PYCR2        | 38.91    | 67.37    | 53.14    | -0.78 | 0.0349 |
| ATP8         | 2555.69  | 4388.99  | 3472.34  | -0.78 | 0.0057 |
| MDH2         | 360.82   | 620.90   | 490.86   | -0.78 | 0.0152 |
| TMEM55A      | 102.89   | 176.92   | 139.90   | -0.78 | 0.0158 |
| COQ9         | 252.16   | 434.49   | 343.33   | -0.78 | 0.0004 |
| NDUFA1       | 109.55   | 190.05   | 149.80   | -0.79 | 0.0015 |
| ATP6         | 15797.37 | 27276.95 | 21537.16 | -0.79 | 0.0129 |
| NDUFA10      | 297.60   | 515.42   | 406.51   | -0.79 | 0.0022 |
| PANK1        | 328.57   | 568.03   | 448.30   | -0.79 | 0.0002 |
| PRDM5        | 1040.13  | 1801.43  | 1420.78  | -0.79 | 0.0003 |
| TOX          | 5576.08  | 9651.46  | 7613.77  | -0.79 | 0.0155 |
| LOC104976285 | 49.08    | 84.89    | 66.98    | -0.79 | 0.0269 |
| DMD          | 1864.94  | 3239.12  | 2552.03  | -0.80 | 0.0040 |
| FILIP1L      | 576.38   | 1000.82  | 788.60   | -0.80 | 0.0081 |
| HINT2        | 64.01    | 112.08   | 88.04    | -0.80 | 0.0356 |
| UQCRH        | 819.20   | 1429.43  | 1124.31  | -0.80 | 0.0000 |
| APPL1        | 427.95   | 748.45   | 588.20   | -0.81 | 0.0018 |
| AIFM1        | 453.67   | 795.29   | 624.48   | -0.81 | 0.0376 |
| VDAC3        | 399.45   | 699.33   | 549.39   | -0.81 | 0.0111 |
| PHF1         | 45.98    | 79.86    | 62.92    | -0.81 | 0.0349 |
| PKIA         | 163.56   | 287.77   | 225.67   | -0.81 | 0.0400 |
| OAT          | 185.57   | 326.58   | 256.07   | -0.82 | 0.0201 |
| LAMTOR1      | 72.35    | 128.10   | 100.23   | -0.82 | 0.0309 |
| HCCS         | 30.02    | 53.71    | 41.86    | -0.82 | 0.0425 |
| NREP         | 628.50   | 1108.54  | 868.52   | -0.82 | 0.0429 |
| PIN4         | 47.46    | 82.92    | 65.19    | -0.82 | 0.0075 |
| SMOX         | 229.37   | 406.12   | 317.75   | -0.82 | 0.0351 |
| TAF10        | 129.37   | 229.09   | 179.23   | -0.82 | 0.0000 |
| C9H6orf203   | 63.26    | 113.11   | 88.19    | -0.82 | 0.0117 |
| NDUFA2       | 92.02    | 163.57   | 127.79   | -0.83 | 0.0124 |
| NDUFC1       | 122.79   | 219.11   | 170.95   | -0.83 | 0.0051 |
| MBOAT1       | 496.43   | 882.83   | 689.63   | -0.83 | 0.0061 |
| CDKN1B       | 183.74   | 326.85   | 255.29   | -0.83 | 0.0012 |
| COX3         | 30140.85 | 53574.56 | 41857.70 | -0.83 | 0.0058 |
| MGC148714    | 477.31   | 851.80   | 664.56   | -0.83 | 0.0000 |
| IMP3         | 33.77    | 60.99    | 47.38    | -0.84 | 0.0209 |
| JMY          | 807.42   | 1445.80  | 1126.61  | -0.84 | 0.0396 |
| ACOT11       | 193.40   | 347.45   | 270.43   | -0.84 | 0.0021 |
| RDH14        | 54.35    | 97.85    | 76.10    | -0.84 | 0.0007 |
| C21H14orf2   | 201.63   | 363.52   | 282.57   | -0.84 | 0.0005 |
| ATP5J        | 326.28   | 586.28   | 456.28   | -0.85 | 0.0000 |
| KRTCAP2      | 110.89   | 200.21   | 155.55   | -0.85 | 0.0013 |

|            |          |          |          |       |        |
|------------|----------|----------|----------|-------|--------|
| SCAND1     | 38.90    | 70.65    | 54.77    | -0.85 | 0.0151 |
| MRPS36     | 133.57   | 242.21   | 187.89   | -0.85 | 0.0017 |
| ZDHHC14    | 595.59   | 1077.52  | 836.55   | -0.85 | 0.0418 |
| EMC6       | 23.53    | 42.08    | 32.80    | -0.86 | 0.0276 |
| ANK3       | 3398.05  | 6161.91  | 4779.98  | -0.86 | 0.0145 |
| BNIP3L     | 325.20   | 591.04   | 458.12   | -0.86 | 0.0116 |
| COX4I1     | 1005.41  | 1827.48  | 1416.44  | -0.86 | 0.0023 |
| KANK1      | 944.53   | 1724.62  | 1334.57  | -0.87 | 0.0376 |
| PAIP2B     | 43.31    | 79.16    | 61.23    | -0.87 | 0.0020 |
| SLMAP      | 2664.13  | 4869.81  | 3766.97  | -0.87 | 0.0419 |
| GPR34      | 11.55    | 21.15    | 16.35    | -0.87 | 0.0377 |
| NDUFA5     | 207.09   | 381.08   | 294.08   | -0.87 | 0.0000 |
| ATP5F1     | 1095.42  | 2016.51  | 1555.97  | -0.88 | 0.0017 |
| COX17      | 74.66    | 138.28   | 106.47   | -0.88 | 0.0032 |
| COX5A      | 566.14   | 1043.69  | 804.91   | -0.88 | 0.0097 |
| GBAS       | 750.38   | 1384.83  | 1067.61  | -0.88 | 0.0000 |
| SUOX       | 140.28   | 260.04   | 200.16   | -0.88 | 0.0062 |
| ARHGAP29   | 1424.96  | 2634.26  | 2029.61  | -0.89 | 0.0013 |
| PRDX5      | 196.92   | 365.56   | 281.24   | -0.89 | 0.0156 |
| POLR3K     | 53.09    | 98.84    | 75.97    | -0.89 | 0.0010 |
| ARHGAP24   | 2992.59  | 5549.76  | 4271.17  | -0.89 | 0.0030 |
| GNG5       | 458.51   | 853.17   | 655.84   | -0.89 | 0.0080 |
| ADCY10     | 25.47    | 48.61    | 37.04    | -0.90 | 0.0136 |
| POLDIP2    | 126.68   | 237.54   | 182.11   | -0.90 | 0.0009 |
| NDUFS2     | 559.43   | 1042.79  | 801.11   | -0.90 | 0.0042 |
| MBOAT2     | 76.45    | 142.87   | 109.66   | -0.90 | 0.0170 |
| ZNF169     | 28.53    | 53.90    | 41.22    | -0.90 | 0.0486 |
| C7H19orf70 | 91.77    | 172.20   | 131.99   | -0.90 | 0.0070 |
| ABI2       | 358.48   | 671.79   | 515.13   | -0.90 | 0.0313 |
| ISCU       | 222.76   | 418.03   | 320.40   | -0.91 | 0.0050 |
| NDUFS6     | 93.62    | 176.90   | 135.26   | -0.91 | 0.0187 |
| TBC1D8     | 535.54   | 1007.45  | 771.49   | -0.91 | 0.0148 |
| NDUFA8     | 167.07   | 315.83   | 241.45   | -0.91 | 0.0012 |
| UQCRB      | 367.99   | 696.56   | 532.28   | -0.92 | 0.0006 |
| PAQR3      | 52.27    | 99.00    | 75.64    | -0.92 | 0.0382 |
| NDUFB6     | 260.50   | 494.16   | 377.33   | -0.92 | 0.0046 |
| TIGD2      | 71.11    | 135.38   | 103.25   | -0.92 | 0.0043 |
| CITED2     | 79.31    | 150.19   | 114.75   | -0.92 | 0.0370 |
| ADK        | 2964.59  | 5624.78  | 4294.69  | -0.92 | 0.0334 |
| CYTB       | 11545.33 | 21961.03 | 16753.18 | -0.93 | 0.0053 |
| ATP5O      | 752.01   | 1432.60  | 1092.30  | -0.93 | 0.0001 |
| HECTD2     | 258.03   | 492.35   | 375.19   | -0.93 | 0.0314 |
| ZFYVE21    | 22.83    | 44.25    | 33.54    | -0.94 | 0.0222 |



|              |          |          |          |       |        |
|--------------|----------|----------|----------|-------|--------|
| RDX          | 965.07   | 1851.27  | 1408.17  | -0.94 | 0.0111 |
| ATP5A1       | 3573.25  | 6858.72  | 5215.98  | -0.94 | 0.0020 |
| HSPB8        | 376.43   | 728.44   | 552.44   | -0.95 | 0.0353 |
| NDUFB10      | 193.37   | 375.16   | 284.26   | -0.95 | 0.0001 |
| APOLD1       | 47.07    | 90.74    | 68.91    | -0.95 | 0.0390 |
| EFHB         | 27.78    | 54.02    | 40.90    | -0.95 | 0.0151 |
| USMG5        | 207.92   | 404.81   | 306.36   | -0.96 | 0.0000 |
| CCDC92       | 76.03    | 149.00   | 112.51   | -0.96 | 0.0315 |
| KIT          | 366.34   | 713.65   | 540.00   | -0.96 | 0.0490 |
| TM4SF18      | 63.62    | 125.02   | 94.32    | -0.96 | 0.0094 |
| GOT2         | 454.92   | 888.90   | 671.91   | -0.97 | 0.0003 |
| PTPMT1       | 37.24    | 73.37    | 55.30    | -0.97 | 0.0051 |
| ILK          | 542.76   | 1061.59  | 802.17   | -0.97 | 0.0469 |
| SNAPIN       | 55.61    | 108.41   | 82.01    | -0.97 | 0.0037 |
| FAM20C       | 65.45    | 128.97   | 97.21    | -0.97 | 0.0483 |
| MMACHC       | 35.77    | 71.15    | 53.46    | -0.97 | 0.0006 |
| C1GALT1      | 1617.39  | 3177.67  | 2397.53  | -0.97 | 0.0233 |
| PRKACB       | 1319.43  | 2598.14  | 1958.78  | -0.98 | 0.0049 |
| SMDT1        | 116.97   | 231.47   | 174.22   | -0.98 | 0.0055 |
| SSSCA1       | 10.84    | 21.36    | 16.10    | -0.98 | 0.0224 |
| RNF149       | 454.72   | 898.83   | 676.77   | -0.98 | 0.0305 |
| PFDN4        | 75.15    | 147.99   | 111.57   | -0.98 | 0.0482 |
| ARSB         | 469.48   | 927.58   | 698.53   | -0.98 | 0.0020 |
| LOC100297725 | 30.51    | 61.30    | 45.90    | -0.99 | 0.0069 |
| HPRT1        | 200.89   | 397.97   | 299.43   | -0.99 | 0.0344 |
| ACADSB       | 314.32   | 623.34   | 468.83   | -0.99 | 0.0036 |
| FAM107A      | 62.89    | 125.64   | 94.27    | -0.99 | 0.0241 |
| SLC25A6      | 1682.87  | 3340.60  | 2511.74  | -0.99 | 0.0034 |
| MSN          | 1067.75  | 2121.85  | 1594.80  | -0.99 | 0.0323 |
| SOD1         | 323.04   | 644.59   | 483.81   | -0.99 | 0.0006 |
| PLAC8L1      | 26.00    | 52.36    | 39.18    | -1.00 | 0.0266 |
| COX7B        | 367.64   | 735.61   | 551.63   | -1.00 | 0.0002 |
| SELENOW      | 188.75   | 377.56   | 283.15   | -1.00 | 0.0021 |
| NDUFB1       | 71.04    | 143.20   | 107.12   | -1.00 | 0.0030 |
| DBT          | 661.22   | 1332.08  | 996.65   | -1.01 | 0.0008 |
| CYC1         | 364.65   | 734.82   | 549.73   | -1.01 | 0.0368 |
| ATP5C1       | 919.02   | 1853.26  | 1386.14  | -1.01 | 0.0001 |
| MYO5A        | 187.92   | 378.59   | 283.25   | -1.01 | 0.0432 |
| GCNT1        | 134.20   | 271.50   | 202.85   | -1.01 | 0.0394 |
| ROBO4        | 35.36    | 71.89    | 53.63    | -1.01 | 0.0250 |
| ND1          | 13225.19 | 26785.78 | 20005.49 | -1.02 | 0.0094 |
| PABPC4       | 489.95   | 993.40   | 741.68   | -1.02 | 0.0120 |
| UQCRRF51     | 467.88   | 949.29   | 708.59   | -1.02 | 0.0009 |

|            |         |         |         |       |        |
|------------|---------|---------|---------|-------|--------|
| GPR137C    | 38.93   | 79.17   | 59.05   | -1.02 | 0.0115 |
| ATP5H      | 750.99  | 1524.51 | 1137.75 | -1.02 | 0.0001 |
| CYP2U1     | 124.26  | 251.68  | 187.97  | -1.02 | 0.0039 |
| PHLDB2     | 1560.63 | 3171.56 | 2366.10 | -1.02 | 0.0142 |
| RGCC       | 68.43   | 139.72  | 104.07  | -1.02 | 0.0121 |
| PEMT       | 21.26   | 43.76   | 32.51   | -1.03 | 0.0229 |
| PDHB       | 260.72  | 532.73  | 396.73  | -1.03 | 0.0001 |
| AK1        | 58.34   | 120.51  | 89.42   | -1.03 | 0.0059 |
| ST3GAL4    | 137.45  | 283.44  | 210.44  | -1.04 | 0.0007 |
| TCEAL4     | 66.61   | 136.03  | 101.32  | -1.04 | 0.0203 |
| ROMO1      | 37.99   | 78.98   | 58.49   | -1.04 | 0.0131 |
| CCPG1      | 860.65  | 1772.83 | 1316.74 | -1.04 | 0.0034 |
| CCR5       | 6.26    | 13.35   | 9.81    | -1.04 | 0.0448 |
| PEA15      | 321.86  | 664.78  | 493.32  | -1.05 | 0.0373 |
| HSPE1      | 303.35  | 627.70  | 465.53  | -1.05 | 0.0000 |
| USH2A      | 11.49   | 23.67   | 17.58   | -1.05 | 0.0296 |
| C7H19orf60 | 25.04   | 52.36   | 38.70   | -1.05 | 0.0056 |
| DKK2       | 49.97   | 104.00  | 76.98   | -1.06 | 0.0161 |
| WIPI1      | 61.62   | 128.95  | 95.29   | -1.06 | 0.0126 |
| TIMM10     | 22.70   | 47.96   | 35.33   | -1.06 | 0.0092 |
| ACOX2      | 148.81  | 310.01  | 229.41  | -1.06 | 0.0327 |
| COX7C      | 330.73  | 690.27  | 510.50  | -1.06 | 0.0070 |
| SOD2       | 45.58   | 96.48   | 71.03   | -1.07 | 0.0231 |
| RASSF9     | 50.77   | 107.38  | 79.07   | -1.07 | 0.0486 |
| GOT1       | 199.23  | 419.57  | 309.40  | -1.07 | 0.0032 |
| NDUFA13    | 133.18  | 280.91  | 207.04  | -1.07 | 0.0123 |
| HSD17B10   | 151.01  | 318.71  | 234.86  | -1.07 | 0.0001 |
| MAF1       | 175.68  | 369.88  | 272.78  | -1.07 | 0.0025 |
| ZBTB16     | 4091.46 | 8624.04 | 6357.75 | -1.08 | 0.0325 |
| SEC14L1    | 343.59  | 725.37  | 534.48  | -1.08 | 0.0249 |
| ATP5J2     | 296.34  | 626.62  | 461.48  | -1.08 | 0.0000 |
| ETFRF1     | 139.69  | 296.25  | 217.97  | -1.08 | 0.0131 |
| DLD        | 803.61  | 1700.65 | 1252.13 | -1.08 | 0.0039 |
| CTSF       | 163.50  | 346.53  | 255.01  | -1.08 | 0.0370 |
| ATP5G3     | 509.27  | 1078.52 | 793.90  | -1.08 | 0.0044 |
| ABTB2      | 282.36  | 600.93  | 441.64  | -1.09 | 0.0015 |
| ESRRA      | 118.84  | 253.34  | 186.09  | -1.09 | 0.0246 |
| NDUFS3     | 167.85  | 357.83  | 262.84  | -1.09 | 0.0025 |
| RTN1       | 12.11   | 26.47   | 19.29   | -1.09 | 0.0494 |
| ERO1B      | 269.88  | 575.88  | 422.88  | -1.09 | 0.0329 |
| EPM2A      | 162.78  | 347.31  | 255.04  | -1.09 | 0.0061 |
| SLC9B2     | 50.47   | 108.73  | 79.60   | -1.09 | 0.0094 |
| COX6B1     | 136.71  | 292.75  | 214.73  | -1.09 | 0.0007 |

|           |          |          |          |       |        |
|-----------|----------|----------|----------|-------|--------|
| APOBR     | 8.58     | 18.16    | 13.37    | -1.09 | 0.0196 |
| SMAD9     | 96.30    | 206.91   | 151.60   | -1.09 | 0.0149 |
| COX2      | 23655.54 | 50555.55 | 37105.55 | -1.10 | 0.0038 |
| ATP5L     | 553.52   | 1184.46  | 868.99   | -1.10 | 0.0009 |
| CYB5R1    | 22.97    | 49.77    | 36.37    | -1.10 | 0.0081 |
| PLCB1     | 11456.31 | 24627.09 | 18041.70 | -1.10 | 0.0119 |
| NR2F2     | 90.72    | 195.68   | 143.20   | -1.11 | 0.0162 |
| FBXO32    | 279.17   | 603.21   | 441.19   | -1.11 | 0.0262 |
| NDUFB9    | 203.10   | 440.81   | 321.96   | -1.11 | 0.0002 |
| ECI2      | 72.22    | 157.82   | 115.02   | -1.12 | 0.0032 |
| BTNL9     | 15.91    | 34.15    | 25.03    | -1.12 | 0.0181 |
| HSD17B8   | 56.28    | 123.10   | 89.69    | -1.12 | 0.0015 |
| IGIP      | 15.50    | 33.54    | 24.52    | -1.12 | 0.0069 |
| TCAIM     | 51.26    | 111.30   | 81.28    | -1.12 | 0.0359 |
| UQCR11    | 103.99   | 228.59   | 166.29   | -1.13 | 0.0000 |
| SLC35F3   | 549.44   | 1220.00  | 884.72   | -1.15 | 0.0443 |
| PM20D2    | 56.46    | 126.51   | 91.49    | -1.15 | 0.0187 |
| MAP1LC3A  | 44.35    | 99.46    | 71.91    | -1.16 | 0.0072 |
| PRDX2     | 603.94   | 1353.82  | 978.88   | -1.16 | 0.0002 |
| NPAT      | 699.84   | 1573.85  | 1136.85  | -1.17 | 0.0072 |
| MAGEF1    | 38.31    | 86.60    | 62.45    | -1.17 | 0.0036 |
| CDC42EP1  | 302.89   | 687.79   | 495.34   | -1.18 | 0.0176 |
| MDH1      | 770.44   | 1750.21  | 1260.33  | -1.18 | 0.0002 |
| NDUFS7    | 111.18   | 253.28   | 182.23   | -1.18 | 0.0264 |
| DYSF      | 419.62   | 956.23   | 687.93   | -1.19 | 0.0382 |
| TFRC      | 836.74   | 1911.27  | 1374.01  | -1.19 | 0.0012 |
| PCDH17    | 154.04   | 351.90   | 252.97   | -1.19 | 0.0085 |
| HEBP2     | 96.71    | 222.35   | 159.53   | -1.20 | 0.0154 |
| CLIC5     | 636.44   | 1464.53  | 1050.49  | -1.20 | 0.0286 |
| LRRC8B    | 154.74   | 356.92   | 255.83   | -1.20 | 0.0398 |
| ATP5B     | 3230.70  | 7452.42  | 5341.56  | -1.21 | 0.0003 |
| ARHGEF26  | 1031.92  | 2384.58  | 1708.25  | -1.21 | 0.0020 |
| TLE4      | 1194.56  | 2769.65  | 1982.10  | -1.21 | 0.0097 |
| UQCRC1    | 430.28   | 998.46   | 714.37   | -1.21 | 0.0098 |
| ATP5I     | 127.52   | 297.79   | 212.66   | -1.22 | 0.0012 |
| RUSC2     | 281.61   | 656.98   | 469.29   | -1.22 | 0.0012 |
| PDXP      | 13.99    | 32.38    | 23.18    | -1.22 | 0.0086 |
| ENPP4     | 654.33   | 1528.46  | 1091.40  | -1.22 | 0.0349 |
| RASGRP2   | 15.26    | 35.42    | 25.34    | -1.23 | 0.0335 |
| COX5B     | 572.04   | 1340.23  | 956.13   | -1.23 | 0.0008 |
| DZANK1    | 75.24    | 177.35   | 126.29   | -1.24 | 0.0155 |
| LOC782270 | 85.34    | 201.82   | 143.58   | -1.24 | 0.0000 |
| HMOX1     | 19.10    | 45.77    | 32.43    | -1.24 | 0.0328 |

|            |         |         |         |       |        |
|------------|---------|---------|---------|-------|--------|
| TMEM145    | 6.86    | 16.83   | 11.84   | -1.25 | 0.0388 |
| SYN3       | 70.33   | 166.80  | 118.57  | -1.25 | 0.0478 |
| COX7A2     | 192.51  | 460.49  | 326.50  | -1.26 | 0.0011 |
| BOLA1      | 9.95    | 24.08   | 17.01   | -1.26 | 0.0120 |
| EMILIN1    | 87.35   | 209.78  | 148.56  | -1.27 | 0.0459 |
| ROGDI      | 52.31   | 126.64  | 89.47   | -1.27 | 0.0469 |
| SMIM13     | 368.16  | 887.51  | 627.83  | -1.27 | 0.0086 |
| PTGDR      | 9.55    | 22.87   | 16.21   | -1.27 | 0.0436 |
| TRIM2      | 1944.32 | 4706.06 | 3325.19 | -1.28 | 0.0167 |
| CTH        | 32.50   | 79.71   | 56.11   | -1.28 | 0.0124 |
| AASS       | 539.02  | 1320.72 | 929.87  | -1.29 | 0.0010 |
| LYPD6B     | 63.38   | 156.64  | 110.01  | -1.30 | 0.0296 |
| RNF128     | 669.00  | 1647.83 | 1158.41 | -1.30 | 0.0451 |
| EPHA6      | 611.25  | 1509.98 | 1060.61 | -1.30 | 0.0275 |
| TMEM47     | 80.72   | 199.19  | 139.95  | -1.30 | 0.0248 |
| TMEM161B   | 1326.58 | 3277.38 | 2301.98 | -1.30 | 0.0103 |
| ZCCHC11    | 595.09  | 1472.90 | 1034.00 | -1.31 | 0.0040 |
| ST3GAL1    | 21.98   | 55.71   | 38.85   | -1.32 | 0.0383 |
| TRIB2      | 114.41  | 286.71  | 200.56  | -1.32 | 0.0069 |
| CS         | 1128.08 | 2819.79 | 1973.94 | -1.32 | 0.0001 |
| LOC783604  | 23.14   | 58.27   | 40.71   | -1.33 | 0.0489 |
| UQCC3      | 18.20   | 45.97   | 32.08   | -1.33 | 0.0017 |
| PLCG2      | 149.78  | 377.87  | 263.83  | -1.33 | 0.0173 |
| SIDT2      | 43.50   | 111.01  | 77.26   | -1.34 | 0.0251 |
| PPM1K      | 427.34  | 1084.78 | 756.06  | -1.34 | 0.0002 |
| PDLIM4     | 24.17   | 61.94   | 43.05   | -1.36 | 0.0264 |
| GPR176     | 172.49  | 443.02  | 307.75  | -1.36 | 0.0210 |
| VOPP1      | 342.08  | 878.61  | 610.34  | -1.36 | 0.0027 |
| SLC9A7     | 81.75   | 210.86  | 146.31  | -1.36 | 0.0414 |
| LOC783202  | 34.71   | 90.10   | 62.40   | -1.37 | 0.0493 |
| CCNG1      | 1581.70 | 4084.31 | 2833.00 | -1.37 | 0.0019 |
| DIXDC1     | 159.89  | 416.15  | 288.02  | -1.38 | 0.0167 |
| SLC25A3    | 1144.87 | 2993.27 | 2069.07 | -1.39 | 0.0000 |
| COX6A1     | 560.18  | 1465.10 | 1012.64 | -1.39 | 0.0002 |
| FIGN       | 17.89   | 47.12   | 32.51   | -1.39 | 0.0080 |
| PELI3      | 9.19    | 24.98   | 17.09   | -1.40 | 0.0231 |
| C11H9orf69 | 27.10   | 71.83   | 49.46   | -1.41 | 0.0058 |
| SMOC2      | 24.01   | 64.18   | 44.09   | -1.41 | 0.0029 |
| HCN1       | 24.76   | 66.07   | 45.41   | -1.42 | 0.0023 |
| SLC27A1    | 170.84  | 458.14  | 314.49  | -1.42 | 0.0060 |
| ZDHHC2     | 294.32  | 794.69  | 544.51  | -1.43 | 0.0371 |
| HTR4       | 21.06   | 57.76   | 39.41   | -1.46 | 0.0331 |
| PMEL       | 5.20    | 14.63   | 9.92    | -1.48 | 0.0183 |

|            |         |          |          |       |        |
|------------|---------|----------|----------|-------|--------|
| C22H3orf62 | 19.54   | 54.56    | 37.05    | -1.48 | 0.0023 |
| EPHA5      | 55.14   | 154.67   | 104.91   | -1.49 | 0.0445 |
| UQCR10     | 133.07  | 374.06   | 253.57   | -1.49 | 0.0012 |
| SNRNP25    | 17.55   | 49.65    | 33.60    | -1.49 | 0.0000 |
| STYXL1     | 13.44   | 37.90    | 25.67    | -1.50 | 0.0374 |
| PDGFD      | 1442.52 | 4090.87  | 2766.69  | -1.50 | 0.0041 |
| NKAIN2     | 19.30   | 55.64    | 37.47    | -1.51 | 0.0052 |
| RGMA       | 43.98   | 125.95   | 84.97    | -1.52 | 0.0364 |
| CD36       | 401.00  | 1153.66  | 777.33   | -1.52 | 0.0286 |
| BCAT2      | 150.46  | 438.53   | 294.49   | -1.54 | 0.0061 |
| DESI1      | 124.39  | 363.66   | 244.02   | -1.54 | 0.0090 |
| SLC7A6     | 146.43  | 429.19   | 287.81   | -1.55 | 0.0000 |
| NDUFA3     | 85.41   | 251.62   | 168.52   | -1.56 | 0.0024 |
| GMPR       | 66.62   | 196.01   | 131.32   | -1.56 | 0.0282 |
| SLC22A16   | 26.15   | 77.68    | 51.92    | -1.56 | 0.0029 |
| GPR155     | 92.51   | 273.84   | 183.17   | -1.56 | 0.0111 |
| CCDC60     | 52.32   | 155.52   | 103.92   | -1.57 | 0.0106 |
| FKBP5      | 3750.91 | 11159.51 | 7455.21  | -1.57 | 0.0057 |
| UQCRQ      | 111.78  | 336.44   | 224.11   | -1.58 | 0.0001 |
| TRPM3      | 181.40  | 545.43   | 363.42   | -1.59 | 0.0141 |
| PXYLP1     | 41.45   | 126.26   | 83.85    | -1.60 | 0.0056 |
| NDUFS8     | 47.96   | 146.46   | 97.21    | -1.60 | 0.0053 |
| ARMC12     | 25.70   | 78.37    | 52.03    | -1.61 | 0.0203 |
| CCDC8      | 65.64   | 200.26   | 132.95   | -1.61 | 0.0187 |
| PRELID2    | 510.03  | 1565.77  | 1037.90  | -1.62 | 0.0041 |
| PIK3C2G    | 8337.17 | 25722.22 | 17029.69 | -1.63 | 0.0439 |
| SLC30A4    | 93.89   | 290.51   | 192.20   | -1.63 | 0.0040 |
| GNA14      | 180.43  | 561.08   | 370.76   | -1.64 | 0.0124 |
| LGALS3     | 520.09  | 1621.27  | 1070.68  | -1.64 | 0.0028 |
| PLAUR      | 45.12   | 141.42   | 93.27    | -1.64 | 0.0159 |
| LRP2BP     | 5.17    | 16.61    | 10.89    | -1.64 | 0.0154 |
| LRRC63     | 9.86    | 31.55    | 20.71    | -1.64 | 0.0175 |
| OXCT1      | 770.35  | 2413.22  | 1591.78  | -1.65 | 0.0008 |
| STAP1      | 8.37    | 27.04    | 17.71    | -1.65 | 0.0210 |
| RAB3C      | 90.02   | 286.80   | 188.41   | -1.67 | 0.0143 |
| METTL12    | 15.11   | 48.80    | 31.95    | -1.67 | 0.0021 |
| STBD1      | 17.86   | 56.63    | 37.24    | -1.68 | 0.0262 |
| GLUL       | 2054.97 | 6611.76  | 4333.36  | -1.69 | 0.0079 |
| CTNND2     | 36.93   | 119.53   | 78.23    | -1.69 | 0.0082 |
| OPLAH      | 16.79   | 54.82    | 35.80    | -1.70 | 0.0334 |
| ESM1       | 23.06   | 76.53    | 49.80    | -1.72 | 0.0210 |
| LURAP1     | 15.30   | 50.90    | 33.10    | -1.72 | 0.0118 |
| RANGRF     | 7.37    | 24.53    | 15.95    | -1.73 | 0.0007 |

|           |        |         |         |       |        |
|-----------|--------|---------|---------|-------|--------|
| PPP1R9A   | 762.16 | 2528.92 | 1645.54 | -1.73 | 0.0015 |
| CBLN2     | 7.61   | 24.71   | 16.16   | -1.73 | 0.0040 |
| NKIRAS1   | 23.00  | 77.41   | 50.20   | -1.74 | 0.0003 |
| NALCN     | 71.16  | 240.11  | 155.63  | -1.75 | 0.0187 |
| LOXL4     | 6.32   | 20.90   | 13.61   | -1.76 | 0.0323 |
| CDH18     | 61.55  | 212.80  | 137.18  | -1.78 | 0.0110 |
| RALYL     | 48.44  | 167.10  | 107.77  | -1.79 | 0.0429 |
| ENTPD6    | 103.76 | 360.16  | 231.96  | -1.79 | 0.0003 |
| CHCHD10   | 43.61  | 151.80  | 97.71   | -1.79 | 0.0034 |
| NPR3      | 59.97  | 209.20  | 134.59  | -1.80 | 0.0186 |
| VEPH1     | 137.77 | 480.40  | 309.09  | -1.80 | 0.0082 |
| SLC25A5   | 427.39 | 1496.24 | 961.82  | -1.81 | 0.0025 |
| SATB1     | 382.60 | 1339.27 | 860.94  | -1.81 | 0.0015 |
| MYZAP     | 609.39 | 2136.25 | 1372.82 | -1.81 | 0.0001 |
| FZD7      | 13.32  | 47.91   | 30.61   | -1.85 | 0.0134 |
| ZNF385B   | 236.15 | 851.38  | 543.77  | -1.85 | 0.0308 |
| SLC25A30  | 304.30 | 1099.44 | 701.87  | -1.85 | 0.0008 |
| SLC2A4    | 22.80  | 82.40   | 52.60   | -1.86 | 0.0366 |
| LIFR      | 794.65 | 2890.10 | 1842.38 | -1.86 | 0.0049 |
| ATP7B     | 210.75 | 767.79  | 489.27  | -1.86 | 0.0085 |
| CLGN      | 11.81  | 42.79   | 27.30   | -1.87 | 0.0014 |
| IL20RA    | 312.61 | 1149.28 | 730.94  | -1.88 | 0.0179 |
| C5AR2     | 10.36  | 38.61   | 24.49   | -1.88 | 0.0150 |
| MYCBPAP   | 24.93  | 92.26   | 58.60   | -1.88 | 0.0412 |
| FAM149A   | 144.10 | 534.45  | 339.28  | -1.89 | 0.0014 |
| PDZD2     | 221.96 | 837.64  | 529.80  | -1.92 | 0.0024 |
| NDUFA4    | 293.67 | 1123.88 | 708.77  | -1.94 | 0.0001 |
| GPRIN3    | 31.37  | 120.97  | 76.17   | -1.94 | 0.0361 |
| AUTS2     | 72.35  | 280.10  | 176.22  | -1.95 | 0.0007 |
| LOC505383 | 83.58  | 324.26  | 203.92  | -1.96 | 0.0009 |
| CA9       | 352.50 | 1370.62 | 861.56  | -1.96 | 0.0152 |
| PLEKHB1   | 216.85 | 846.41  | 531.63  | -1.96 | 0.0089 |
| DIRAS2    | 12.75  | 50.09   | 31.42   | -1.97 | 0.0425 |
| CA11      | 6.41   | 25.79   | 16.10   | -1.97 | 0.0080 |
| MATK      | 15.63  | 61.89   | 38.76   | -1.97 | 0.0126 |
| ME3       | 202.30 | 800.74  | 501.52  | -1.98 | 0.0023 |
| CIART     | 7.73   | 30.70   | 19.21   | -1.98 | 0.0165 |
| AHCYL2    | 757.34 | 3003.64 | 1880.49 | -1.99 | 0.0005 |
| CKMT2     | 17.67  | 72.03   | 44.85   | -2.00 | 0.0008 |
| PBLD      | 7.87   | 32.04   | 19.96   | -2.01 | 0.0481 |
| SLC16A10  | 551.91 | 2251.12 | 1401.52 | -2.03 | 0.0053 |
| RBFox3    | 15.85  | 64.71   | 40.28   | -2.03 | 0.0105 |
| SNN       | 7.94   | 33.10   | 20.52   | -2.04 | 0.0269 |

|              |          |           |           |       |        |
|--------------|----------|-----------|-----------|-------|--------|
| TIAM2        | 234.75   | 988.24    | 611.50    | -2.07 | 0.0004 |
| KLF15        | 24.65    | 105.19    | 64.92     | -2.09 | 0.0033 |
| IDH2         | 682.85   | 2959.06   | 1820.95   | -2.12 | 0.0001 |
| OTOGL        | 8.98     | 40.19     | 24.58     | -2.17 | 0.0396 |
| FRZB         | 27.95    | 125.45    | 76.70     | -2.17 | 0.0474 |
| ITIH4        | 43.66    | 198.43    | 121.05    | -2.18 | 0.0007 |
| SMARCD3      | 81.75    | 374.02    | 227.89    | -2.19 | 0.0001 |
| MBNL3        | 75.06    | 346.68    | 210.87    | -2.21 | 0.0015 |
| NNT          | 1412.89  | 6523.66   | 3968.28   | -2.21 | 0.0001 |
| SLC22A3      | 294.44   | 1363.12   | 828.78    | -2.21 | 0.0000 |
| CPT1B        | 14.00    | 64.80     | 39.40     | -2.21 | 0.0009 |
| RASGRP3      | 149.26   | 712.51    | 430.89    | -2.25 | 0.0015 |
| RASGRP1      | 79.08    | 387.55    | 233.31    | -2.29 | 0.0050 |
| EGLN3        | 101.59   | 500.95    | 301.27    | -2.30 | 0.0046 |
| CDKN2B       | 8.61     | 43.28     | 25.95     | -2.33 | 0.0132 |
| ATP5G1       | 167.18   | 845.47    | 506.32    | -2.34 | 0.0002 |
| CKB          | 352.14   | 1805.26   | 1078.70   | -2.36 | 0.0001 |
| SLC7A8       | 34.69    | 178.67    | 106.68    | -2.36 | 0.0100 |
| SLC4A2       | 113.26   | 592.63    | 352.95    | -2.39 | 0.0028 |
| SCN1B        | 12.08    | 64.09     | 38.09     | -2.39 | 0.0008 |
| CISD3        | 7.22     | 38.62     | 22.92     | -2.40 | 0.0001 |
| CADM4        | 5.24     | 28.14     | 16.69     | -2.42 | 0.0046 |
| DTNA         | 1092.91  | 6051.76   | 3572.34   | -2.47 | 0.0000 |
| LOC100196897 | 5.84     | 33.08     | 19.46     | -2.49 | 0.0095 |
| KCTD16       | 61.79    | 352.22    | 207.00    | -2.51 | 0.0027 |
| IGLL1        | 152.28   | 877.86    | 515.07    | -2.53 | 0.0130 |
| OPCML        | 43.80    | 253.26    | 148.53    | -2.53 | 0.0077 |
| MAPK13       | 49.60    | 297.85    | 173.72    | -2.58 | 0.0036 |
| SLC1A2       | 62.36    | 376.58    | 219.47    | -2.59 | 0.0487 |
| ANKRD55      | 5.31     | 32.83     | 19.07     | -2.62 | 0.0106 |
| PCNX2        | 110.83   | 680.07    | 395.45    | -2.62 | 0.0026 |
| CHST9        | 60.50    | 388.29    | 224.39    | -2.68 | 0.0036 |
| DNAH5        | 9.02     | 58.62     | 33.82     | -2.68 | 0.0012 |
| UNC13D       | 10.64    | 70.65     | 40.64     | -2.72 | 0.0019 |
| RNF212B      | 31.58    | 215.39    | 123.49    | -2.77 | 0.0048 |
| PGA5         | 25905.36 | 178278.37 | 102091.86 | -2.78 | 0.0008 |
| PPARGC1A     | 413.25   | 2893.83   | 1653.54   | -2.81 | 0.0000 |
| LDHB         | 380.23   | 2829.40   | 1604.82   | -2.90 | 0.0000 |
| PTGER3       | 304.39   | 2274.86   | 1289.63   | -2.90 | 0.0000 |
| SERPINA5     | 108.59   | 812.39    | 460.49    | -2.90 | 0.0037 |
| TMED6        | 14.56    | 114.33    | 64.45     | -2.97 | 0.0007 |
| PALM3        | 8.14     | 65.39     | 36.77     | -2.99 | 0.0024 |
| ASAH2        | 8.26     | 70.91     | 39.58     | -3.09 | 0.0014 |

|              |          |           |           |       |        |
|--------------|----------|-----------|-----------|-------|--------|
| NXPE2        | 15.23    | 140.46    | 77.85     | -3.20 | 0.0021 |
| SLC16A7      | 670.19   | 6400.76   | 3535.48   | -3.26 | 0.0000 |
| RBM46        | 11.22    | 108.68    | 59.95     | -3.28 | 0.0020 |
| FAM20A       | 178.11   | 1878.46   | 1028.28   | -3.40 | 0.0002 |
| GABRB1       | 35.73    | 413.88    | 224.81    | -3.53 | 0.0008 |
| COX8B        | 26.62    | 337.86    | 182.24    | -3.67 | 0.0002 |
| CLIC6        | 160.61   | 2068.36   | 1114.48   | -3.69 | 0.0068 |
| LYZ2         | 50879.80 | 655257.22 | 353068.51 | -3.69 | 0.0003 |
| SLC25A4      | 95.20    | 1257.29   | 676.24    | -3.72 | 0.0000 |
| ACACB        | 15.72    | 208.96    | 112.34    | -3.72 | 0.0006 |
| BMPRI1B      | 24.25    | 342.32    | 183.28    | -3.82 | 0.0000 |
| ATP6V1G3     | 10.40    | 160.94    | 85.67     | -3.95 | 0.0123 |
| FABP3        | 28.43    | 443.60    | 236.02    | -3.96 | 0.0000 |
| GHRL         | 77.61    | 1259.19   | 668.40    | -4.02 | 0.0064 |
| COL17A1      | 27.60    | 483.37    | 255.48    | -4.13 | 0.0015 |
| SERPINI1     | 42.34    | 744.96    | 393.65    | -4.14 | 0.0014 |
| EIF5A2       | 21.47    | 441.25    | 231.36    | -4.36 | 0.0000 |
| GIMD1        | 7.56     | 200.80    | 104.18    | -4.72 | 0.0000 |
| LYZ1         | 8713.19  | 237176.25 | 122944.72 | -4.77 | 0.0008 |
| LYZ3         | 3162.47  | 96643.75  | 49903.11  | -4.93 | 0.0006 |
| HDC          | 10.66    | 331.31    | 170.99    | -4.95 | 0.0000 |
| FLT3         | 25.39    | 902.83    | 464.11    | -5.15 | 0.0003 |
| CYM          | 4056.21  | 201922.11 | 102989.16 | -5.64 | 0.0007 |
| CDH16        | 21.25    | 1073.80   | 547.52    | -5.66 | 0.0001 |
| SLC26A7      | 35.17    | 2363.22   | 1199.19   | -6.07 | 0.0000 |
| AQP4         | 8.59     | 853.15    | 430.87    | -6.63 | 0.0002 |
| KCND2        | 25.08    | 3123.41   | 1574.24   | -6.96 | 0.0000 |
| ESRRG        | 115.75   | 16967.51  | 8541.63   | -7.20 | 0.0000 |
| ATP4A        | 97.51    | 33999.30  | 17048.41  | -8.45 | 0.0000 |
| LOC516849    | 8.06     | 3855.18   | 1931.62   | -8.90 | 0.0000 |
| LOC107131263 | 15.32    | 8001.66   | 4008.49   | -9.03 | 0.0000 |

---
